# Supplementary material for: The epidemiological profile of hysterectomy in rural Chinese women: a population-based study
Source: PubMed Central journal article supplement — BMJ Open. 2017 Jun 30;7(6):e015351. doi: 10.1136/bmjopen-2016-015351 (PMC5734410; doi:10.1136/bmjopen-2016-015351), 2017-06-30
Supplement: bmjopen-2016-015351.draft_revisions.pdf [file bmjopen-2016-015351.draft_revisions.pdf]

# BMJ Open

## The epidemiological profile of hysterectomy in rural Chinese women: a population-based study

|                                 |                                                                                                                                                                                                                                                                                                                                                                                                                                                                                                                                                                                                                                       |
|---------------------------------|---------------------------------------------------------------------------------------------------------------------------------------------------------------------------------------------------------------------------------------------------------------------------------------------------------------------------------------------------------------------------------------------------------------------------------------------------------------------------------------------------------------------------------------------------------------------------------------------------------------------------------------|
| Journal:                        | <i>BMJ Open</i>                                                                                                                                                                                                                                                                                                                                                                                                                                                                                                                                                                                                                       |
| Manuscript ID                   | bmjopen-2016-015351                                                                                                                                                                                                                                                                                                                                                                                                                                                                                                                                                                                                                   |
| Article Type:                   | Research                                                                                                                                                                                                                                                                                                                                                                                                                                                                                                                                                                                                                              |
| Date Submitted by the Author:   | 30-Nov-2016                                                                                                                                                                                                                                                                                                                                                                                                                                                                                                                                                                                                                           |
| Complete List of Authors:       | Liu, Fangfang; Peking University Cancer Hospital & Institute, Key Laboratory of Carcinogenesis and Translational Research (Ministry of Education/Beijing), Laboratory of Genetics<br>Pan, Yaqi<br>Liang, Yongmei<br>Zhang, Chaoting<br>Deng, Qiuju<br>Li, Xiang<br>Liu, Mengfei<br>He, Zhonghu<br>Liu, Ying<br>Li, Jingjing<br>Ning, Tao<br>Guo, Chuanhai<br>Xu, Ruiping; Anyang Cancer Hospital<br>Zhang, Lixin; Anyang Cancer Hospital<br>Cai, Hong<br>Ke, Yang; Peking University Cancer Hospital & Institute, Key Laboratory of Carcinogenesis and Translational Research (Ministry of Education/Beijing), Laboratory of Genetics |
| <b>Primary Subject Heading</b>: | Epidemiology                                                                                                                                                                                                                                                                                                                                                                                                                                                                                                                                                                                                                          |
| Secondary Subject Heading:      | Obstetrics and gynaecology                                                                                                                                                                                                                                                                                                                                                                                                                                                                                                                                                                                                            |
| Keywords:                       | Epidemiology < TROPICAL MEDICINE, GYNAECOLOGY, Hysterectomy, Prevalence                                                                                                                                                                                                                                                                                                                                                                                                                                                                                                                                                               |
|                                 |                                                                                                                                                                                                                                                                                                                                                                                                                                                                                                                                                                                                                                       |

SCHOLARONE™  
Manuscripts

## TITLE PAGE

## TITLE

The epidemiological profile of hysterectomy in rural Chinese women: a population-based study

## RUNNING TITLE

Hysterectomy in rural China

## AUTHORS AND AFFILIATIONS:

Fangfang Liu<sup>a†</sup>, Yaqi Pan<sup>a†</sup>, Yongmei Liang<sup>a</sup>, Chaoting Zhang<sup>a</sup>, Qiuju Deng<sup>a</sup>, Xiang Li<sup>a</sup>,  
Mengfei Liu<sup>a</sup>, Zhonghu He<sup>a</sup>, Ying Liu<sup>a</sup>, Jingjing Li<sup>a</sup>, Tao Ning<sup>a</sup>, Chuanhai Guo<sup>a</sup>, Ruiping Xu<sup>b</sup>,  
Lixin Zhang<sup>b</sup>, Hong Cai<sup>a</sup> and Yang Ke<sup>a\*</sup>

a Key Laboratory of Carcinogenesis and Translational Research (Ministry of Education/Beijing), Laboratory of Genetics, Peking University Cancer Hospital & Institute, No. 52 Fucheng Road, Haidian District, Beijing 100142, China

b Anyang Cancer Hospital, No. 1 Binhebei Rd, Anyang, Henan Province 455000, China

† These authors contributed equally to this paper.

**CORRESPONDING AUTHOR:****Yang Ke:**

Key Laboratory of Carcinogenesis and Translational Research (Ministry of Education/Beijing), Laboratory of Genetics, Peking University Cancer Hospital & Institute, No. 52 Fucheng Road, Haidian District, Beijing 100142, China.

Phone: 86-10-88196762; Fax: 86-10-88196735;

E-mail: [keyang@bjmu.edu.cn](mailto:keyang@bjmu.edu.cn)

**Word Count:** 2005 words.

**Number of tables:** 2 tables.

**Number of figures:** 1 figure.

**Number of supplementary materials:** 1 supplementary table.

**Number of references:** 30 references.

**ABSTRACT**

**Objectives.** Hysterectomy is one of the most common surgical procedures performed on women in developed countries, however, little is known about the epidemiology of hysterectomy in developing regions. This study seeks to evaluate the prevalence of hysterectomy and its determinants in rural China.

**Methods.** Questionnaires were collected from 3328 female adults aged 25-68 years in rural Anyang, China in 2009-2011. Hysterectomy status was ascertained by the gynecologist at the time of cytological test. Univariate and multivariate logistic regression analyses were performed to assess the risk factors for hysterectomy.

**Results.** The overall prevalence of hysterectomy was 3.31% (110/3,328). Women above the age of 40 years had a higher prevalence of hysterectomy, compared to those aged 25-40 years (4.36% vs. 0.45%). Obesity and history of prior pregnancy loss were associated with greater odds of hysterectomy (Adjusted OR=1.62, 95% CI, 1.01-2.60; adjusted OR=1.51, 95% CI, 1.02-2.25, respectively). Of the 75 (68.18%, 75/110) cases who provided further information on hysterectomy, 84.00% (63/75) had undergone total abdominal hysterectomy, and 70.67% (53/75) had received surgery for leiomyoma.

**Conclusions.** Rural Chinese women had a relatively low prevalence of hysterectomy, and the majority of reported hysterectomies were performed abdominally for leiomyoma. Hysterectomy prevalence differed significantly by age, body mass index, and history of pregnancy loss. This study expands the current understanding of the epidemiology of hysterectomy in lower-resource areas.

1  
2  
3  
4 **Keywords** Hysterectomy; prevalence; risk factors; indications; surgical types  
5  
6

7 **Strengths and limitations of this study**  
8  
9

10 1. This is the first study to demonstrate the age-specific prevalence of and factors associated  
11 with hysterectomy in a general population in rural China; one of the main strengths is,  
12 therefore, the population-based nature and low-resource setting of this study.  
13  
14

15 2. The use of hysterectomy status data ascertained by a gynecologist in a cervical cytology  
16 screening program in rural China, where no regional or national databases were available,  
17 enabled us to estimate the prevalence and determinants of hysterectomy in this area.  
18  
19

20 3. The possibility of a response bias of participants may reduce the generalizability of our  
21 findings to a wider population.  
22  
23

24 4. The small number of hysterectomy cases may have affected the precision of our assessment  
25 of the predictors of hysterectomy.  
26  
27  
28  
29  
30  
31  
32  
33  
34  
35  
36  
37  
38  
39  
40  
41  
42  
43  
44  
45  
46  
47  
48  
49  
50  
51  
52  
53  
54  
55  
56  
57  
58  
59  
60

## INTRODUCTION

Hysterectomy is one of the most frequent surgical procedures performed on women in developed countries.<sup>1</sup> The epidemiology of hysterectomy in the female general population is of public health importance because this procedure may affect the population at risk for uterine diseases<sup>2</sup> and it may also be associated with significant socioeconomic and personal consequences when widely performed. Previous studies, mainly undertaken in developed regions, have shown that the prevalence of hysterectomy varies substantially by race and geographic area (4%-40%).<sup>3-6</sup> Education level, age at first birth, parity, number of miscarriages, and other potential risk factors have been inconsistently associated with the risk of hysterectomy.<sup>7-9</sup> The indications for and surgical techniques used for hysterectomy have also been found to differ across regions<sup>1, 10-13</sup>; however, in general, the major indication for hysterectomy is leiomyoma, and the dominant surgical type is abdominal hysterectomy.<sup>1, 14</sup>

Till now, the epidemiology of hysterectomy in developing countries, including China, remains largely unknown. This population-based cross-sectional study, among 3,328 rural Chinese women, seeks to: 1) assess the age-specific prevalence and determinants of hysterectomy; and 2) investigate indications for and types of hysterectomy among identified cases.

## METHODS

### Study population

This population-based survey was part of an ongoing esophageal cancer cohort study in rural Anyang, China.<sup>14</sup> The current investigation utilized a subset including 6 of the 9 target

1  
2  
3  
4  
5  
6  
7  
8  
9  
10  
11  
12  
13  
14  
15  
16  
17  
18  
19  
20  
21  
22  
23  
24  
25  
26  
27  
28  
29  
30  
31  
32  
33  
34  
35  
36  
37  
38  
39  
40  
41  
42  
43  
44  
45  
46  
47  
48  
49  
50  
51  
52  
53  
54  
55  
56  
57  
58  
59  
60

villages involved in the parent cohort study conducted from 2009 to 2011. Eligibility criteria for subjects enrolled in this study were as follows: 1) female permanent residency in the target villages; 2) aged 25-68 years; 3) no prior diagnosis of cancer, mental disorder, or cardiovascular disease; and 4) no past history of HBV, HCV, or HIV infection. All participants in this study provided written informed consent. This study was approved by the Institutional Review Board of the Peking University School of Oncology, China. The methods were carried out in accordance with the approved guidelines.

### Measurements

Briefly, hysterectomy status was ascertained by a gynecologist at the time of gynecologic examination and cytological test. Data on sociodemographic factors, cigarette smoking (defined as at least one cigarette or more per day for at least one year), alcohol consumption (defined as the consumption of Chinese liquor two or more times per week for at least one year), reproductive history, and personal health habits (e.g., genital washing before sexual intercourse) were collected through face-to-face interviews. Height and weight were measured by the interviewers.

For cases reporting a hysterectomy, information on the indications for and surgical techniques used to perform hysterectomy were also recorded. In this study, the modes of hysterectomy were divided into six categories, including total abdominal hysterectomy (involving removal of the uterus and its attached cervix through an incision in the lower abdomen), subtotal abdominal hysterectomy (involving removal of only the uterine body, leaving the cervix intact, through an incision in the lower abdomen), vaginal hysterectomy (involving removal of the

1  
2  
3  
4 uterus via the vagina, without an abdominal incision), laparoscopic hysterectomy (involving  
5  
6 the use of laparoscopy to perform hysterectomy), radical hysterectomy (involving removal of  
7  
8 the uterus and resection of the ventral or lateral parametria), and other unspecified  
9  
10 hysterectomy.  
11  
12

### 13 14 **Statistical analysis**

15  
16  
17 Potential risk factors that were statistically significant in univariate logistic regression  
18  
19 analyses, together with relevant variables previously reported in literatures were included in  
20  
21 the final multivariate models. Significant differences between groups were quantified by  
22  
23 calculating adjusted odds ratios (OR) and 95% confidence intervals (CI). Linear regression  
24  
25 models were used to determine whether any variables in the multivariate models were highly  
26  
27 collinear. In this study, all variance inflation factors were below 3.0 and therefore within the  
28  
29 acceptable range.  
30  
31  
32  
33

34  
35  
36 Statistical analyses were performed using STATA version 12.0 (STATA Corporation, College  
37  
38 Station, TX, USA). All statistical tests were two-sided at the 0.05 significance level.  
39  
40  
41  
42  
43

## 44 **RESULTS**

### 45 46 **Participant characteristics**

47  
48  
49 Of 3,849 eligible candidates, 3,328 (86.5%) were enrolled in the study (the other 521  
50  
51 candidates, who were more frequently of younger age, did not participate, mainly because  
52  
53 they were employed outside of Anyang). The median age of these 3,328 participants was 43  
54  
55  
56  
57  
58  
59  
60



1  
2  
3  
4 years. Most subjects were married or cohabiting (95.00%); of the participants, 92.85% had a  
5  
6 level of education of less than 9 years, and 88.52% were engaged in farming (Supplementary  
7  
8 Table S1). Both cigarette smoking (0.27%) and alcohol consumption (0.21%) were  
9  
10 uncommon. Approximately one half of the women were overweight (31.40%) or obese  
11  
12 (18.66%), 43.27% reported menarche at the age of  $\leq 15$  years, 39.84% had their first birth at  
13  
14 the age of  $\leq 22$  years, 37.71% had a parity  $> 2$ , 43.66% reported having a history of fetal loss,  
15  
16 77.34% used an intrauterine contraceptive device, 37.89% reported having had a tubal  
17  
18 ligation, and 8.80% had a history of post-intercourse bleeding.  
19  
20  
21  
22  
23

#### 24 **Prevalence and risk factors for hysterectomy**

25  
26  
27 The overall prevalence of hysterectomy was 3.31% (110/3328), with the age-specific  
28  
29 prevalence ranging from 0.25% (1/401) to 7.45% (21/282) (Figure 1). Women above the age  
30  
31 of 40 years had a higher prevalence of hysterectomy compared to those aged 25-40 years  
32  
33 (4.36% vs. 0.45%, data not shown). Obese women were found to be at greater odds of  
34  
35 hysterectomy (Adjusted OR=1.62; 95% CI, 1.01-2.60; body mass index (BMI)  $\geq 28.0$  vs.  $18.5$   
36  
37  $\leq$  BMI  $< 24.0$ ) (Table 1). History of prior pregnancy loss conferred a greater risk for  
38  
39 hysterectomy (Adjusted OR=1.51; 95% CI, 1.02-2.25) (Table 1).  
40  
41  
42  
43  
44  
45

#### 46 **Indications and surgical types for hysterectomy**

47  
48  
49 Of the 75 (68.18%, 75/110) cases who provided further information on hysterectomy, 70.67%  
50  
51 (53/75) had a hysterectomy performed for leiomyoma, 10.67% (8/75) had a hysterectomy  
52  
53 performed for dysfunctional uterine bleeding, 1.33% (1/75) had a hysterectomy performed for  
54  
55 cervical cancer, and 6.67% (5/75) had a hysterectomy performed for other indications (Table  
56  
57  
58  
59  
60

1  
2  
3  
4 2). Total abdominal hysterectomy was the most common surgical technique (84.00%, 63/75),  
5  
6 while other methods such as vaginal hysterectomy (2.67%, 2/75) and laparoscopic  
7  
8 hysterectomy (1.33%, 1/75) each accounted for  $\leq 3\%$  of the total hysterectomies.  
9  
10

## 11 12 13 14 15 **DISCUSSION**

16  
17  
18 To our knowledge, this is the first study to demonstrate the age-specific prevalence of and  
19  
20 factors associated with hysterectomy in a general population in rural China. Data from this  
21  
22 study demonstrated that rural Chinese women had a low overall and age-specific prevalence  
23  
24 of hysterectomy. Obesity and history of prior pregnancy loss were associated with greater  
25  
26 odds of hysterectomy. The most common indication for hysterectomy was leiomyoma, and  
27  
28 the predominant procedure performed was abdominal hysterectomy. This investigation  
29  
30 expands our knowledge about the epidemiological profile of hysterectomy in a low-income  
31  
32 setting.  
33  
34  
35  
36  
37

38  
39 The overall prevalence of hysterectomy (3.3%) in our study was considerably lower than  
40  
41 previous findings from studies conducted in developed countries such as the United States,  
42  
43 Ireland, and Australia (26.2%, 22.2%, and 22.0%, respectively)<sup>4, 5, 15, 16</sup> but closer to that  
44  
45 identified in India (4-7%).<sup>6</sup> The low hysterectomy prevalence may be due to various reasons  
46  
47 including poverty, poor access to medical care, and fear of surgical operations.<sup>17</sup> Additionally,  
48  
49 the cultural norms associated with fertility-preserving treatment may also have contributed to  
50  
51 the relatively lower prevalence of hysterectomy.<sup>18, 19</sup> The uterus, as the childbearing organ, is  
52  
53 seen as the essence of womanhood in China. Some individuals may feel that they are no  
54  
55  
56  
57  
58  
59  
60

1  
2  
3  
4 longer women after hysterectomy. Indeed, one previous study showed that Chinese-American  
5  
6 women who were educated in China and presumably less acculturated into the American  
7  
8 “hysterectomy-prone” culture had a low hysterectomy rate.<sup>20</sup>  
9

10  
11 Although the age-specific prevalence of hysterectomy was generally lower than the  
12  
13 previously reported rates in high-resource regions, the pattern of the age distribution of  
14  
15 hysterectomy prevalence was consistently similar.<sup>11</sup> The age-specific prevalence of  
16  
17 hysterectomy started to increase in women aged 41-45 years and thereafter remained  
18  
19 relatively stable, which could be due to the sharp increase in hysterectomy incidence rates in  
20  
21 this age group.<sup>11,21</sup> According to previous studies, this increase may be driven by the high  
22  
23 occurrence of uterine leiomyoma, the main indication for surgically removing the uterus,  
24  
25 among women aged 41-49 years.<sup>21</sup>  
26  
27  
28  
29  
30  
31

32 In this study, prior pregnancy loss was associated with greater odds of hysterectomy; this  
33  
34 finding is consistent with previous reports.<sup>8, 9, 22</sup> Complications such as uterine perforation  
35  
36 resulting from surgical abortion may lead to the application of hysterectomy as a treatment  
37  
38 option.<sup>23</sup> In addition to being a risk factor, pregnancy loss may also be a reflection of uterine  
39  
40 dysfunction that leads to an indication for hysterectomy. Concerning BMI, a higher  
41  
42 hysterectomy prevalence was observed in obese women in this study, confirming findings  
43  
44 from other studies.<sup>24</sup> The correlation between obesity and hysterectomy can be partially  
45  
46 explained by the fact that obesity elevates the risk of many gynecological conditions that may  
47  
48 result in hysterectomy.<sup>25</sup> For instance, obesity has been reported to be associated with pelvic  
49  
50 organ prolapse and uterine fibroids, which are common indications for hysterectomy.<sup>26</sup> Obese  
51  
52 women are also more likely to develop endometrial carcinomas and pelvic inflammatory  
53  
54  
55  
56  
57  
58  
59  
60

1  
2  
3  
4 diseases, which are less common indications for hysterectomy.<sup>25</sup> In terms of schooling, lower  
5  
6 education level has been associated with a higher risk of hysterectomy, however, this  
7  
8 association seems to vary by geographic location.<sup>2, 12, 22, 27, 28</sup> In this study, no correlation was  
9  
10 found between education level and hysterectomy. Whether this null risk estimate was a true  
11  
12 lack of association or merely due to insufficient statistical power because of the small number  
13  
14 of hysterectomy cases and low proportion of women with high education levels included in  
15  
16 our analysis is unclear. Further studies with larger sample sizes are warranted to validate the  
17  
18 factors affecting hysterectomy.  
19  
20  
21  
22  
23

24 Similar to reports from Taiwan<sup>29</sup> and Western countries,<sup>21, 22</sup> leiomyoma of the uterus  
25  
26 predominated among the medical conditions leading to hysterectomy in this study population.  
27  
28 Among women undergoing hysterectomy, abdominal hysterectomy was the most frequently  
29  
30 performed procedure, also in agreement with most previous studies.<sup>1, 11</sup> However, the  
31  
32 frequencies at which different types of hysterectomies were performed have been found to  
33  
34 vary markedly across populations and over time, probably due to differences in healthcare  
35  
36 resources, surgeon experience, and patient attitudes.<sup>11, 15, 30</sup> According to a Cochrane review of  
37  
38 studies mainly conducted in Western countries, vaginal hysterectomy, which has become  
39  
40 more widely performed, appeared to be superior to laparoscopic and abdominal hysterectomy  
41  
42 for benign diseases, as it has been associated with a speedier return to normal activities due to  
43  
44 smaller incisions.<sup>30</sup> However, there is limited evidence about the changes in hysterectomy  
45  
46 rates over time and the relative superiority of hysterectomy approaches for addressing benign  
47  
48 conditions in low-resource settings, and further research in this regard is needed.  
49  
50  
51  
52  
53  
54  
55  
56  
57

58 As regional or national databases in rural China are not as readily available as they are in  
59  
60

1  
2  
3  
4 developed countries, the use of hysterectomy status data ascertained by a gynecologist in a  
5  
6 cervical cytology screening program among rural Chinese women enabled us to estimate the  
7  
8 prevalence and determinants of hysterectomy in this area. Thus, one of the main strengths of  
9  
10 this study is the population-based nature and low-resource setting. The limitations of this  
11  
12 study are as follows. First, the possibility of a response bias of participants may reduce the  
13  
14 generalizability of our findings to a wider population. Second, self-reported maternal and  
15  
16 reproductive characteristics may be subject to recall bias. Third, the small number of  
17  
18 hysterectomy cases may have affected the precision of our assessment of the predictors of  
19  
20 hysterectomy. Finally, due to the cross-sectional nature of this study, a temporal relationship  
21  
22 cannot be inferred. Despite these limitations, our study still provides baseline information on  
23  
24 the prevalence and determinants of hysterectomy, as well as indications for and procedures  
25  
26 used in hysterectomies in rural China.  
27  
28  
29  
30  
31  
32

33  
34 In summary, rural Chinese women had a relatively low prevalence of hysterectomy, which  
35  
36 were largely performed abdominally for leiomyoma. Older age, obesity and history of prior  
37  
38 fetal loss were associated with increased risk of hysterectomy among this study population.  
39  
40 These findings provide insights into the hysterectomy epidemiology in lower-resource areas.  
41  
42 Further studies are needed to monitor the trend of incidence rate of hysterectomy and modes  
43  
44 of surgery over time.  
45  
46  
47  
48  
49  
50  
51  
52

### 53 **CONTRIBUTORS**

54  
55  
56  
57  
58  
59  
60  
YK and HC were involved in the design and conducting of the survey. YP, YL, FL, QD, XL,

1  
2  
3  
4 ML, ZH, YL, JL, TN, CG, RX and LZ were involved in conducting the field work. FL and CZ  
5  
6 performed the statistical analyses and wrote the manuscript text. All authors reviewed the  
7  
8 manuscript.  
9

#### 10 11 12 13 14 15 **ETHICAL APPROVAL AND INFORMED CONSENT**

16  
17  
18 The study was approved by the Institutional Review Board of the School of Oncology, Peking  
19  
20 University (Approval number: 2006020). All participants provided written informed consent.  
21  
22 The methods were carried out in accordance with the approved guidelines.  
23  
24  
25  
26  
27  
28

#### 29 **FUNDING**

30  
31  
32 This work was supported by the Beijing Municipal Science and Technology Commission  
33  
34 [grant number Z141100002114046]; the Charity Project of National Ministry of Health [grant  
35  
36 number 201202014]; the "863" Key Projects of National Ministry of Science and Technology  
37  
38 Grant [grant numbers 2012AA02A209 and 2012AA022502]; and the Natural Science  
39  
40 Foundation of China [grant number 81502855].  
41  
42  
43  
44  
45  
46  
47  
48

#### 49 **DATA SHARING**

50  
51  
52 No additional data available.  
53  
54  
55  
56  
57

#### 58 **CONFLICT OF INTEREST**

1  
2  
3  
4 The authors declare they have no conflict of interest with respect to this research study and  
5  
6 paper.  
7  
8  
9  
10

#### 11 12 **ACKNOWLEDGEMENTS** 13

14  
15 We thank Dr. Robert S. Burk for editing and correction of this manuscript.  
16  
17  
18  
19  
20  
21  
22  
23  
24  
25  
26  
27  
28  
29  
30  
31  
32  
33  
34  
35  
36  
37  
38  
39  
40  
41  
42  
43  
44  
45  
46  
47  
48  
49  
50  
51  
52  
53  
54  
55  
56  
57  
58  
59  
60

## REFERENCES

1. Garry R. The future of hysterectomy. *BJOG : an international journal of obstetrics and gynaecology*. 2005 Feb;112(2):133-9.
2. Koepsell TD, Weiss NS, Thompson DJ, Martin DP. Prevalence of prior hysterectomy in the Seattle-Tacoma area. *Am J Public Health*. 1980 Jan;70(1):40-7.
3. Pokras R, Hufnagel VG. Hysterectomies in the United States. *Vital and health statistics Series 13, Data from the National Health Survey*. 1987 Dec(92):1-32.
4. Wilcox LS, Koonin LM, Pokras R, Strauss LT, Xia Z, Peterson HB. Hysterectomy in the United States, 1988-1990. *Obstet Gynecol*. 1994 Apr;83(4):549-55.
5. McPherson K, Strong PM, Epstein A, Jones L. Regional variations in the use of common surgical procedures: within and between England and Wales, Canada and the United States of America. *Social science & medicine Part A, Medical sociology*. 1981 May;15(3 Pt 1):273-88.
6. Singh A, Arora AK. Profile of menopausal women in rural north India. *Climacteric : the journal of the International Menopause Society*. 2005 Jun;8(2):177-84.
7. Stang A, Kluttig A, Moebus S, Volzke H, Berger K, Greiser KH, et al. Educational level, prevalence of hysterectomy, and age at amenorrhoea: a cross-sectional analysis of 9536 women from six population-based cohort studies in Germany. *BMC women's health*. 2014;14:10.
8. Dharmalingam A, Pool I, Dickson J. Biosocial determinants of hysterectomy in New Zealand. *Am J Public Health*. 2000 Sep;90(9):1455-8.
9. Zhang Y, Lee ET, Cowan LD, North KE, Wild RA, Howard BV. Hysterectomy prevalence and cardiovascular disease risk factors in American Indian women. *Maturitas*. 2005 Nov-Dec;52(3-4):328-36.
10. Weaver F, Hynes D, Goldberg JM, Khuri S, Daley J, Henderson W. Hysterectomy in Veterans Affairs Medical Centers. *Obstet Gynecol*. 2001 Jun;97(6):880-4.
11. Merrill RM. Hysterectomy surveillance in the United States, 1997 through 2005. *Medical science monitor : international medical journal of experimental and clinical research*. 2008 Jan;14(1):CR24-31.



12. Byles JE, Mishra G, Schofield M. Factors associated with hysterectomy among women in Australia. *Health & place*. 2000 Dec;6(4):301-8.
13. DeCherney AH, Bachmann G, Isaacson K, Gall S. Postoperative fatigue negatively impacts the daily lives of patients recovering from hysterectomy. *Obstet Gynecol*. 2002 Jan;99(1):51-7.
14. Liu F, Guo F, Zhou Y, He Z, Tian X, Guo C, et al. The Anyang Esophageal Cancer Cohort Study: study design, implementation of fieldwork, and use of computer-aided survey system. *PLoS One*. 2012;7(2):e31602.
15. Spilsbury K, Semmens JB, Hammond I, Bolck A. Persistent high rates of hysterectomy in Western Australia: a population-based study of 83 000 procedures over 23 years. *BJOG : an international journal of obstetrics and gynaecology*. 2006 Jul;113(7):804-9.
16. van Keep PA, Wildemeersch D, Lehert P. Hysterectomy in six European countries. *Maturitas*. 1983 Aug;5(2):69-75.
17. Singh A, Arora AK. Why hysterectomy rate are lower in India. *Indian Journal of Community Medicine* 2008;33(3):196-97.
18. Stang A, Merrill RM, Kuss O. Hysterectomy in Germany: a DRG-based nationwide analysis, 2005-2006. *Deutsches Arzteblatt international*. 2011 Jul;108(30):508-14.
19. Broder MS, Kanouse DE, Mittman BS, Bernstein SJ. The appropriateness of recommendations for hysterectomy. *Obstet Gynecol*. 2000 Feb;95(2):199-205.
20. Powell LH, Meyer P, Weiss G, Matthews KA, Santoro N, Randolph JF, Jr., et al. Ethnic differences in past hysterectomy for benign conditions. *Womens Health Issues*. 2005 Jul-Aug;15(4):179-86.
21. Jacobson GF, Shaber RE, Armstrong MA, Hung YY. Hysterectomy rates for benign indications. *Obstet Gynecol*. 2006 Jun;107(6):1278-83.
22. Brett KM, Marsh JV, Madans JH. Epidemiology of hysterectomy in the United States: demographic and reproductive factors in a nationally representative sample. *Journal of women's health / the official publication of the Society for the Advancement of Women's Health Research*. 1997 Jun;6(3):309-16.
23. Grimes DA, Flock ML, Schulz KF, Cates W, Jr. Hysterectomy as treatment for complications of legal abortion. *Obstet Gynecol*. 1984 Apr;63(4):457-62.

- 1  
2  
3 24. Fitzgerald DM, Berecki-Gisolf J, Hockey RL, Dobson AJ. Hysterectomy and weight gain.  
4 Menopause. 2009 Mar-Apr;16(2):279-85.  
5  
6  
7 25. Goodman MT, Hankin JH, Wilkens LR, Lyu LC, McDuffie K, Liu LQ, et al. Diet, body  
8 size, physical activity, and the risk of endometrial cancer. *Cancer Res.* 1997 Nov  
9 15;57(22):5077-85.  
10  
11  
12 26. Pandey S, Bhattacharya S. Impact of obesity on gynecology. *Womens Health (Lond).*  
13 2010 Jan;6(1):107-17.  
14  
15  
16 27. Treloar SA, Do KA, O'Connor VM, O'Connor DT, Yeo MA, Martin NG. Predictors of  
17 hysterectomy: an Australian study. *Am J Obstet Gynecol.* 1999 Apr;180(4):945-54.  
18  
19  
20 28. Nagata C, Takatsuka N, Kawakami N, Shimizu H. Soy product intake and  
21 premenopausal hysterectomy in a follow-up study of Japanese women. *Eur J Clin Nutr.* 2001  
22 Sep;55(9):773-7.  
23  
24  
25 29. Chang C, Mao CL, Hu YH. Prevalence of hysterectomy of Chinese women in Taiwan.  
26 *Int J Gynaecol Obstet.* 1996 Jan;52(1):73-4.  
27  
28  
29 30. Aarts JW, Nieboer TE, Johnson N, Tavender E, Garry R, Mol BW, et al. Surgical  
30 approach to hysterectomy for benign gynaecological disease. *Cochrane Database Syst Rev.*  
31 2015;8:CD003677.  
32  
33  
34  
35  
36  
37  
38  
39  
40  
41  
42  
43  
44  
45  
46  
47  
48  
49  
50  
51  
52  
53  
54  
55  
56  
57  
58  
59  
60

## TABLES

**Table 1.** Prevalence of and risk factors for hysterectomy among women in rural Anyang, China, 2009-2011

| Variables                                             | Hysterectomy,<br>No. (%) | No hysterectomy, No. (%) | Crude OR (95% CI)   | Adjusted OR (95% CI) <sup>a</sup> |
|-------------------------------------------------------|--------------------------|--------------------------|---------------------|-----------------------------------|
| Total                                                 | 110 (3.31)               | 3,218 (96.69)            |                     |                                   |
| Age (years)                                           |                          |                          |                     |                                   |
| 25-40                                                 | 4 (3.64)                 | 892 (27.72)              | 1.00                | 1.00                              |
| 41-56                                                 | 66 (60.00)               | 1,527 (47.45)            | 9.64 (3.50, 26.53)  | 7.81 (2.81, 21.73)                |
| 57-68                                                 | 40 (36.36)               | 799 (24.83)              | 11.16 (3.98, 31.34) | 9.97 (3.35, 29.62)                |
| Marital status                                        |                          |                          |                     |                                   |
| Never married, divorced,<br>separated or widowed      | 5 (4.63)                 | 177 (5.59)               | 1.00                |                                   |
| Married or cohabiting                                 | 103 (95.37)              | 2,992 (94.41)            | 1.22 (0.49, 3.03)   |                                   |
| Type of employment                                    |                          |                          |                     |                                   |
| Farming                                               | 101 (93.52)              | 2,845 (89.78)            | 1.00                |                                   |
| Non-farming                                           | 7 (6.48)                 | 324 (10.22)              | 0.61 (0.28, 1.32)   |                                   |
| Education level                                       |                          |                          |                     |                                   |
| Illiteracy (<1 year) or<br>primary school (1-6 years) | 72 (66.67)               | 1,814 (57.33)            | 1.00                |                                   |
| Junior high school (7-9<br>years)                     | 31 (28.70)               | 1,173 (37.07)            | 0.67 (0.43, 1.02)   |                                   |
| Senior high school or above<br>(>9 years)             | 5 (4.63)                 | 177 (5.59)               | 0.71 (0.28, 1.78)   |                                   |
| Household annual income,<br>RMB                       |                          |                          |                     |                                   |
| ≤10,000                                               | 23 (35.94)               | 511 (30.42)              | 1.00                |                                   |
| 10,001-29,999                                         | 17 (26.56)               | 534 (31.79)              | 0.71 (0.37, 1.34)   |                                   |
| ≥30,000                                               | 24 (37.50)               | 635 (37.80)              | 0.84 (0.47, 1.51)   |                                   |
| Cigarette smoking                                     |                          |                          |                     |                                   |
| Never                                                 | 108 (100.00)             | 3,160 (99.72)            | 1.00                |                                   |
| Ever                                                  | 0 (0.00)                 | 9 (0.28)                 | NE                  |                                   |
| Alcohol consumption                                   |                          |                          |                     |                                   |
| Never                                                 | 107 (99.07)              | 3,163 (99.81)            | 1.00                |                                   |
| Ever                                                  | 1 (0.93)                 | 6 (0.19)                 | 4.93 (0.59, 41.28)  |                                   |
| Body mass index (BMI),<br>Kg/m <sup>2</sup>           |                          |                          |                     |                                   |
| Normal weight (18.5 ≤ BMI<br>< 24.0)                  | 40 (36.70)               | 1,358 (44.42)            | 1.00                | 1.00                              |
| Overweight (24.0 ≤ BMI <<br>28.0)                     | 34 (31.19)               | 1,011 (33.07)            | 1.14 (0.72, 1.82)   | 1.07 (0.66, 1.70)                 |
| Obese (BMI ≥ 28.0)                                    | 34 (31.19)               | 587 (19.20)              | 1.97 (1.23, 3.14)   | 1.62 (1.01, 2.60)                 |
| Underweight (BMI < 18.5)                              | 1 (0.92)                 | 101 (3.30)               | 0.34 (0.05, 2.47)   | 0.40 (0.05, 2.98)                 |
| Age (years) at menarche                               |                          |                          |                     |                                   |
| ≤15                                                   | 46 (42.99)               | 1,394 (44.45)            | 1.00                |                                   |
| 16-18                                                 | 45 (42.06)               | 1,391 (44.36)            | 0.98 (0.65, 1.49)   |                                   |

|    |                                              |             |               |                   |                   |
|----|----------------------------------------------|-------------|---------------|-------------------|-------------------|
| 1  |                                              |             |               |                   |                   |
| 2  |                                              |             |               |                   |                   |
| 3  | ≥19                                          | 16 (14.95)  | 351 (11.19)   | 1.38 (0.77, 2.47) |                   |
| 4  | Menstruation                                 |             |               |                   |                   |
| 5  | Regular                                      | 73 (68.22)  | 2,223 (70.80) | 1.00              |                   |
| 6  | Irregular                                    | 34 (31.78)  | 917 (29.20)   | 0.89 (0.59, 1.34) |                   |
| 7  | Age (years) at first birth                   |             |               |                   |                   |
| 8  | ≤22                                          | 53 (49.53)  | 1,273 (40.84) | 1.00              |                   |
| 9  | 23-24                                        | 31 (28.97)  | 1,102 (35.35) | 0.68 (0.43, 1.06) |                   |
| 10 | ≥25                                          | 23 (21.50)  | 742 (23.80)   | 0.74 (0.45, 1.22) |                   |
| 11 | Number of pregnancies                        |             |               |                   |                   |
| 12 | ≤2                                           | 21 (19.44)  | 884 (28.22)   | 1.00              |                   |
| 13 | 3-4                                          | 53 (49.07)  | 1,518 (48.45) | 1.47 (0.88, 2.45) |                   |
| 14 | ≥5                                           | 34 (31.48)  | 731 (23.33)   | 1.96 (1.13, 3.40) |                   |
| 15 | Parity                                       |             |               |                   |                   |
| 16 | ≤2                                           | 53 (49.07)  | 1,939 (61.77) | 1.00              | 1.00              |
| 17 | >2                                           | 55 (50.93)  | 1,200 (38.23) | 1.68 (1.14, 2.46) | 1.07 (0.68, 1.68) |
| 18 | History of fetal loss                        |             |               |                   |                   |
| 19 | Never                                        | 50 (45.45)  | 1,825 (56.71) | 1.00              | 1.00              |
| 20 | Ever                                         | 60 (54.55)  | 1,393 (43.29) | 1.57 (1.07, 2.30) | 1.51 (1.02, 2.25) |
| 21 | Use of intrauterine<br>contraceptive devices |             |               |                   |                   |
| 22 | No                                           | 29 (26.85)  | 669 (21.14)   | 1.00              |                   |
| 23 | Yes                                          | 79 (73.15)  | 2,495 (78.86) | 0.73 (0.47, 1.13) |                   |
| 24 | Tubal ligation                               |             |               |                   |                   |
| 25 | No                                           | 63 (58.33)  | 1,948 (61.57) | 1.00              |                   |
| 26 | Yes                                          | 45 (41.67)  | 1,216 (38.43) | 1.14 (0.78, 1.69) |                   |
| 27 | History of cervicitis                        |             |               |                   |                   |
| 28 | Never                                        | 91 (86.67)  | 2,534 (85.18) | 1.00              |                   |
| 29 | Ever                                         | 14 (13.33)  | 441 (14.82)   | 0.88 (0.50, 1.57) |                   |
| 30 | History of vaginitis                         |             |               |                   |                   |
| 31 | Never                                        | 80 (76.19)  | 2,410 (80.95) | 1.00              |                   |
| 32 | Ever                                         | 25 (23.81)  | 567 (19.05)   | 1.33 (0.84, 2.10) |                   |
| 33 | History of pelvic inflammation               |             |               |                   |                   |
| 34 | Never                                        | 104 (96.30) | 2,794 (93.92) | 1.00              |                   |
| 35 | Ever                                         | 4 (3.70)    | 181 (6.08)    | 0.59 (0.22, 1.63) |                   |
| 36 | History of post-intercourse<br>bleeding      |             |               |                   |                   |
| 37 | Never                                        | 98 (91.59)  | 2,856 (90.96) | 1.00              |                   |
| 38 | Ever                                         | 9 (8.41)    | 284 (9.04)    | 0.92 (0.46, 1.85) |                   |
| 39 | Genital washing before sex                   |             |               |                   |                   |
| 40 | Rare                                         | 86 (79.63)  | 2,329 (73.52) | 1.00              |                   |
| 41 | Occasional                                   | 11 (10.19)  | 400 (12.63)   | 0.74 (0.39, 1.41) |                   |
| 42 | Often                                        | 111 (10.19) | 439 (13.86)   | 0.68 (0.36, 1.28) |                   |

Abbreviations: OR, odds ratio; CI, confidence interval.

<sup>a</sup> Variables that were statistically significant in univariate analyses were included in multivariate models.

**Table 2.** Indications for and types of surgery among the 75 hysterectomy cases from rural Anyang, China, 2009-2011

| Procedure                       | Leiomyoma   | Dysfunctional uterine bleeding | Cervical cancer | Other       | Total       |
|---------------------------------|-------------|--------------------------------|-----------------|-------------|-------------|
|                                 | No. (%)     |                                |                 |             |             |
| Total abdominal hysterectomy    | 49 (92.45)  | 8 (100.00)                     | 1 (25.00)       | 5 (50.00)   | 63 (84.00)  |
| Subtotal abdominal hysterectomy | 1 (1.89)    | 0 (0.00)                       | 0 (0.00)        | 1 (10.00)   | 2 (2.67)    |
| Vaginal hysterectomy            | 0 (0.00)    | 0 (0.00)                       | 0 (0.00)        | 2 (20.00)   | 2 (2.67)    |
| Laparoscopic hysterectomy       | 1 (1.89)    | 0 (0.00)                       | 0 (0.00)        | 0 (0.00)    | 1 (1.33)    |
| Radical hysterectomy            | 0 (0.00)    | 0 (0.00)                       | 2 (50.00)       | 0 (0.00)    | 2 (2.67)    |
| Other unspecified hysterectomy  | 2 (3.77)    | 0 (0.00)                       | 1 (25.00)       | 2 (20.00)   | 5 (6.67)    |
| Total                           | 53 (100.00) | 8 (100.00)                     | 4 (100.00)      | 10 (100.00) | 75 (100.00) |

**FIGURE LEGEND**

**Figure 1.** Hysterectomy prevalence (%) by age group among 3,328 rural Chinese women, 2009-2011. The numbers of women in the 25-30, 31-35, 36-40, 41-45, 46-50, 51-55, 56-60, and 61-68 years age groups were 397, 401, 530, 635, 282, 418, 345, and 320, respectively.

For peer review only

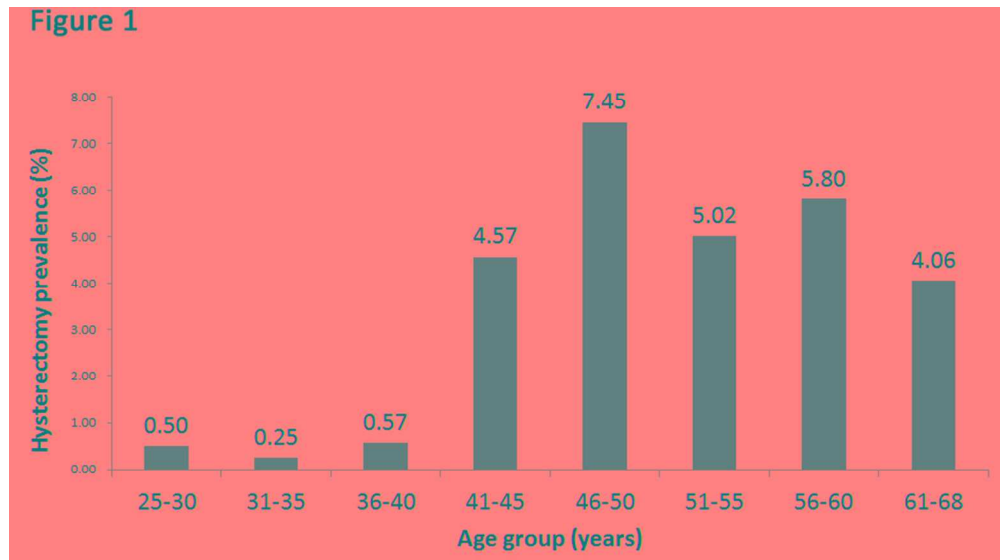

For review only

## Supporting Information

**Supplementary Table S1.** Selected characteristics of women included in the study of hysterectomy in rural Anyang, China, 2009-2011

| Variables                                          | No. (%)        |
|----------------------------------------------------|----------------|
| Total                                              | 3,328 (100.00) |
| Age (years)                                        |                |
| Median (Interquartile range)                       | 43 (36-54)     |
| 25-40                                              | 896 (26.92)    |
| 41-56                                              | 1,593 (47.87)  |
| 57-68                                              | 839 (25.21)    |
| Marital status                                     |                |
| Never married, divorced, separated or widowed      | 182 (5.47)     |
| Married or cohabiting                              | 3,095 (95.00)  |
| Unknown                                            | 51 (1.53)      |
| Type of employment                                 |                |
| Farming                                            | 2,946 (88.52)  |
| Non-farming                                        | 331 (9.95)     |
| Unknown                                            | 51 (1.53)      |
| Education level                                    |                |
| Illiteracy (<1 year) or primary school (1-6 years) | 1,886 (56.67)  |
| Junior high school (7-9 years)                     | 1,204 (36.18)  |
| Senior high school or above (>9 years)             | 182 (5.47)     |
| Unknown                                            | 56 (1.68)      |
| Household annual income, RMB                       |                |
| ≤10,000                                            | 534 (16.05)    |
| 10,001-29,999                                      | 551 (16.56)    |
| ≥30,000                                            | 659 (19.80)    |
| Unknown                                            | 1,584 (47.60)  |
| Cigarette smoking                                  |                |
| Never                                              | 3,268 (98.20)  |
| Ever                                               | 9 (0.27)       |
| Unknown                                            | 51 (1.53)      |
| Alcohol consumption                                |                |
| Never                                              | 3,270 (98.26)  |
| Ever                                               | 7 (0.21)       |
| Unknown                                            | 51 (1.53)      |
| Body mass index (BMI), Kg/m <sup>2</sup>           |                |
| Normal weight (18.5 ≤ BMI < 24.0)                  | 1,398 (42.01)  |
| Overweight (24.0 ≤ BMI < 28.0)                     | 1,045 (31.40)  |
| Obese (BMI ≥ 28.0)                                 | 621 (18.66)    |



|                                          |               |
|------------------------------------------|---------------|
| Underweight (BMI < 18.5)                 | 102 (3.06)    |
| Unknown                                  | 162 (4.87)    |
| Age (years) at menarche                  |               |
| ≤15                                      | 1,440 (43.27) |
| 16-18                                    | 1,436 (43.15) |
| ≥19                                      | 367 (11.03)   |
| Unknown                                  | 85 (2.55)     |
| Menstruation                             |               |
| Regular                                  | 2,296 (68.99) |
| Irregular                                | 951 (28.58)   |
| Unknown                                  | 81 (2.43)     |
| Age (years) at first birth               |               |
| ≤22                                      | 1,326 (39.84) |
| 23-24                                    | 1,133 (34.04) |
| ≥25                                      | 765 (22.99)   |
| Unknown                                  | 104 (3.13)    |
| Number of pregnancies                    |               |
| ≤2                                       | 905 (27.19)   |
| 3-4                                      | 1,571 (47.21) |
| ≥5                                       | 765 (22.99)   |
| Unknown                                  | 87 (2.61)     |
| Parity                                   |               |
| ≤ 2                                      | 1,992 (59.86) |
| > 2                                      | 1,255 (37.71) |
| Unknown                                  | 81 (2.43)     |
| History of fetal loss                    |               |
| Never                                    | 1,875 (56.34) |
| Ever                                     | 1,453 (43.66) |
| Unknown                                  |               |
| Use of intrauterine contraceptive device |               |
| No                                       | 698 (20.97)   |
| Yes                                      | 2,574 (77.34) |
| Unknown                                  | 56 (1.68)     |
| Tubal ligation                           |               |
| No                                       | 2,011 (60.43) |
| Yes                                      | 1,261 (37.89) |
| Unknown                                  | 56 (1.68)     |
| History of cervicitis                    |               |
| Never                                    | 2,625 (78.88) |
| Ever                                     | 455 (13.67)   |
| Unknown                                  | 248 (7.45)    |
| History of vaginitis                     |               |
| Never                                    | 2,490 (74.82) |
| Ever                                     | 592 (17.79)   |

|    |                                      |               |
|----|--------------------------------------|---------------|
| 1  |                                      |               |
| 2  |                                      |               |
| 3  | Unknown                              | 246 (7.39)    |
| 4  | History of pelvic inflammation       |               |
| 5  | Never                                | 2,898 (87.08) |
| 6  | Ever                                 | 185 (5.56)    |
| 7  | Unknown                              | 245 (7.36)    |
| 8  | History of post-intercourse bleeding |               |
| 9  | Never                                | 2,954 (88.76) |
| 10 | Ever                                 | 293 (8.80)    |
| 11 | Unknown                              | 81 (2.43)     |
| 12 | Genital washing before sex           |               |
| 13 | Rare                                 | 2,415 (72.57) |
| 14 | Occasional                           | 411 (12.35)   |
| 15 | Often                                | 450 (13.52)   |
| 16 | Unknown                              | 52 (1.56)     |
| 17 |                                      |               |
| 18 |                                      |               |
| 19 |                                      |               |
| 20 |                                      |               |
| 21 |                                      |               |
| 22 |                                      |               |
| 23 |                                      |               |
| 24 |                                      |               |
| 25 |                                      |               |
| 26 |                                      |               |
| 27 |                                      |               |
| 28 |                                      |               |
| 29 |                                      |               |
| 30 |                                      |               |
| 31 |                                      |               |
| 32 |                                      |               |
| 33 |                                      |               |
| 34 |                                      |               |
| 35 |                                      |               |
| 36 |                                      |               |
| 37 |                                      |               |
| 38 |                                      |               |
| 39 |                                      |               |
| 40 |                                      |               |
| 41 |                                      |               |
| 42 |                                      |               |
| 43 |                                      |               |
| 44 |                                      |               |
| 45 |                                      |               |
| 46 |                                      |               |
| 47 |                                      |               |
| 48 |                                      |               |
| 49 |                                      |               |
| 50 |                                      |               |
| 51 |                                      |               |
| 52 |                                      |               |
| 53 |                                      |               |
| 54 |                                      |               |
| 55 |                                      |               |
| 56 |                                      |               |
| 57 |                                      |               |
| 58 |                                      |               |
| 59 |                                      |               |
| 60 |                                      |               |

# BMJ Open

## The epidemiological profile of hysterectomy in rural Chinese women: a population-based study

|                               |                                                                                                                                                                                                                                                                                                                                                                                                                                                                                                                                                                                                                                                                                                                                                                                                                                                                                                                                                                                                                                                                                                                                                                                                                                                                                                                                                                                                                                                                                                                                                                                                                                                                                                                                                                                                                                                                                                                                                                                                                                                                                                                                                                                                                                                                                                                                                                                                                                                                                                                                                                                                                          |
|-------------------------------|--------------------------------------------------------------------------------------------------------------------------------------------------------------------------------------------------------------------------------------------------------------------------------------------------------------------------------------------------------------------------------------------------------------------------------------------------------------------------------------------------------------------------------------------------------------------------------------------------------------------------------------------------------------------------------------------------------------------------------------------------------------------------------------------------------------------------------------------------------------------------------------------------------------------------------------------------------------------------------------------------------------------------------------------------------------------------------------------------------------------------------------------------------------------------------------------------------------------------------------------------------------------------------------------------------------------------------------------------------------------------------------------------------------------------------------------------------------------------------------------------------------------------------------------------------------------------------------------------------------------------------------------------------------------------------------------------------------------------------------------------------------------------------------------------------------------------------------------------------------------------------------------------------------------------------------------------------------------------------------------------------------------------------------------------------------------------------------------------------------------------------------------------------------------------------------------------------------------------------------------------------------------------------------------------------------------------------------------------------------------------------------------------------------------------------------------------------------------------------------------------------------------------------------------------------------------------------------------------------------------------|
| Journal:                      | <i>BMJ Open</i>                                                                                                                                                                                                                                                                                                                                                                                                                                                                                                                                                                                                                                                                                                                                                                                                                                                                                                                                                                                                                                                                                                                                                                                                                                                                                                                                                                                                                                                                                                                                                                                                                                                                                                                                                                                                                                                                                                                                                                                                                                                                                                                                                                                                                                                                                                                                                                                                                                                                                                                                                                                                          |
| Manuscript ID                 | bmjopen-2016-015351.R1                                                                                                                                                                                                                                                                                                                                                                                                                                                                                                                                                                                                                                                                                                                                                                                                                                                                                                                                                                                                                                                                                                                                                                                                                                                                                                                                                                                                                                                                                                                                                                                                                                                                                                                                                                                                                                                                                                                                                                                                                                                                                                                                                                                                                                                                                                                                                                                                                                                                                                                                                                                                   |
| Article Type:                 | Research                                                                                                                                                                                                                                                                                                                                                                                                                                                                                                                                                                                                                                                                                                                                                                                                                                                                                                                                                                                                                                                                                                                                                                                                                                                                                                                                                                                                                                                                                                                                                                                                                                                                                                                                                                                                                                                                                                                                                                                                                                                                                                                                                                                                                                                                                                                                                                                                                                                                                                                                                                                                                 |
| Date Submitted by the Author: | 11-Feb-2017                                                                                                                                                                                                                                                                                                                                                                                                                                                                                                                                                                                                                                                                                                                                                                                                                                                                                                                                                                                                                                                                                                                                                                                                                                                                                                                                                                                                                                                                                                                                                                                                                                                                                                                                                                                                                                                                                                                                                                                                                                                                                                                                                                                                                                                                                                                                                                                                                                                                                                                                                                                                              |
| Complete List of Authors:     | <p>Liu, Fangfang; Peking University Cancer Hospital &amp; Institute, Key Laboratory of Carcinogenesis and Translational Research (Ministry of Education/Beijing), Laboratory of Genetics</p> <p>Pan, Yaqi; Peking University Cancer Hospital &amp; Institute, Key Laboratory of Carcinogenesis and Translational Research (Ministry of Education/Beijing), Laboratory of Genetics</p> <p>Liang, Yongmei; Peking University Cancer Hospital &amp; Institute, Key Laboratory of Carcinogenesis and Translational Research (Ministry of Education/Beijing), Laboratory of Genetics</p> <p>Zhang, Chaoting; Peking University Cancer Hospital &amp; Institute, Key Laboratory of Carcinogenesis and Translational Research (Ministry of Education/Beijing), Laboratory of Genetics</p> <p>Deng, Qiuju; Peking University Cancer Hospital &amp; Institute, Key Laboratory of Carcinogenesis and Translational Research (Ministry of Education/Beijing), Laboratory of Genetics</p> <p>Li, Xiang; Peking University Cancer Hospital &amp; Institute, Key Laboratory of Carcinogenesis and Translational Research (Ministry of Education/Beijing), Laboratory of Genetics</p> <p>Liu, Mengfei; Peking University Cancer Hospital &amp; Institute, Key Laboratory of Carcinogenesis and Translational Research (Ministry of Education/Beijing), Laboratory of Genetics</p> <p>He, Zhonghu; Peking University Cancer Hospital &amp; Institute, Key Laboratory of Carcinogenesis and Translational Research (Ministry of Education/Beijing), Laboratory of Genetics</p> <p>Liu, Ying; Peking University Cancer Hospital &amp; Institute, Key Laboratory of Carcinogenesis and Translational Research (Ministry of Education/Beijing), Laboratory of Genetics</p> <p>Li, Jingjing; Peking University Cancer Hospital &amp; Institute, Key Laboratory of Carcinogenesis and Translational Research (Ministry of Education/Beijing), Laboratory of Genetics</p> <p>Ning, Tao; Peking University Cancer Hospital &amp; Institute, Key Laboratory of Carcinogenesis and Translational Research (Ministry of Education/Beijing), Laboratory of Genetics</p> <p>Guo, Chuanhai; Peking University Cancer Hospital &amp; Institute, Key Laboratory of Carcinogenesis and Translational Research (Ministry of Education/Beijing), Laboratory of Genetics</p> <p>Xu, Ruiping; Anyang Cancer Hospital</p> <p>Zhang, Lixin; Anyang Cancer Hospital</p> <p>Cai, Hong; Peking University Cancer Hospital &amp; Institute, Key Laboratory of Carcinogenesis and Translational Research (Ministry of Education/Beijing), Laboratory of Genetics</p> |

1  
2  
3  
4  
5  
6  
7  
8  
9  
10  
11  
12  
13  
14  
15  
16  
17  
18  
19  
20  
21  
22  
23  
24  
25  
26  
27  
28  
29  
30  
31  
32  
33  
34  
35  
36  
37  
38  
39  
40  
41  
42  
43  
44  
45  
46  
47  
48  
49  
50  
51  
52  
53  
54  
55  
56  
57  
58  
59  
60

|                                 |                                                                                                                                                                              |
|---------------------------------|------------------------------------------------------------------------------------------------------------------------------------------------------------------------------|
|                                 | Ke, Yang; Peking University Cancer Hospital & Institute, Key Laboratory of Carcinogenesis and Translational Research (Ministry of Education/Beijing), Laboratory of Genetics |
| <b>Primary Subject Heading</b>: | Epidemiology                                                                                                                                                                 |
| Secondary Subject Heading:      | Obstetrics and gynaecology                                                                                                                                                   |
| Keywords:                       | GYNAECOLOGY, Hysterectomy, Prevalence, EPIDEMIOLOGY                                                                                                                          |
|                                 |                                                                                                                                                                              |

SCHOLARONE™  
Manuscripts

For peer review only

## TITLE PAGE

## TITLE

The epidemiological profile of hysterectomy in rural Chinese women: a population-based study

## RUNNING TITLE

Hysterectomy in rural China

## AUTHORS AND AFFILIATIONS:

Fangfang Liu<sup>a†</sup>, Yaqi Pan<sup>a†</sup>, Yongmei Liang<sup>a</sup>, Chaoting Zhang<sup>a</sup>, Qiuju Deng<sup>a</sup>, Xiang Li<sup>a</sup>,  
Mengfei Liu<sup>a</sup>, Zhonghu He<sup>a</sup>, Ying Liu<sup>a</sup>, Jingjing Li<sup>a</sup>, Tao Ning<sup>a</sup>, Chuanhai Guo<sup>a</sup>, Ruiping Xu<sup>b</sup>,  
Lixin Zhang<sup>b</sup>, Hong Cai<sup>a</sup> and Yang Ke<sup>a\*</sup>

a Key Laboratory of Carcinogenesis and Translational Research (Ministry of Education/Beijing), Laboratory of Genetics, Peking University Cancer Hospital & Institute, No. 52 Fucheng Road, Haidian District, Beijing 100142, China

b Anyang Cancer Hospital, No. 1 Binhebei Rd, Anyang, Henan Province 455000, China

† These authors contributed equally to this paper.

**CORRESPONDING AUTHOR:****Yang Ke:**

Key Laboratory of Carcinogenesis and Translational Research (Ministry of Education/Beijing), Laboratory of Genetics, Peking University Cancer Hospital & Institute, No. 52 Fucheng Road, Haidian District, Beijing 100142, China.

Phone: 86-10-88196762; Fax: 86-10-88196735;

E-mail: [keyang@bjmu.edu.cn](mailto:keyang@bjmu.edu.cn)

**Word Count:** 2514 words.

**Number of tables:** 2 tables.

**Number of figures:** 1 figure.

**Number of supplementary materials:** 1 supplementary table and 1 supplementary figure.

**Number of references:** 49 references.

**ABSTRACT**

**Objectives.** Hysterectomy is one of the most common surgical procedures performed on women in developed countries, however, little is known about the epidemiology of hysterectomy in developing regions. This study seeks to evaluate the prevalence of hysterectomy and its risk factors in rural China.

**Methods.** Questionnaires were collected from 3328 female adults aged 25-69 years in rural Anyang, China in 2009-2011. Hysterectomy status was ascertained by the gynecologist at the time of cytological test. Univariate and multivariate regression analyses were performed to assess the risk factors for hysterectomy.

**Results.** The overall prevalence of hysterectomy was 3.31% (110/3,328). Women above the age of 40 years had a higher prevalence of prior hysterectomy, compared to those aged 25-39 years (5.01% vs. 0.33%). Obesity was marginally related with a higher risk of hysterectomy (Adjusted OR=1.59; 95% CI, 0.99-2.56; body mass index (BMI)  $\geq 28.0$  vs.  $18.5 \leq \text{BMI} < 24.0$ ). History of prior pregnancy loss conferred a greater risk for hysterectomy (Adjusted OR=1.51; 95% CI, 1.02-2.23). Of the 75 (68.18%, 75/110) cases who provided further information on hysterectomy, 84.00% (63/75) had undergone total abdominal hysterectomy, and 70.67% (53/75) had received surgery for leiomyoma.

**Conclusions.** Rural Chinese women had a relatively low prevalence of hysterectomy, and the majority of reported hysterectomies were performed abdominally for leiomyoma. Hysterectomy prevalence differed significantly by age, body mass index, and history of pregnancy loss. This study expands the current understanding of the epidemiology of

1  
2  
3  
4 hysterectomy in lower-resource areas.  
5  
6

7 **Keywords** Hysterectomy; prevalence; risk factors; indications; surgical types  
8  
9

10 **Strengths and limitations of this study**  
11

12  
13 1. This is the first study to demonstrate the prevalence of and factors associated with  
14 hysterectomy in a general population in rural China; one of the main strengths is, therefore,  
15 the population-based nature and low-resource setting of this study.  
16  
17

18  
19  
20  
21 2. The use of hysterectomy status data ascertained by a gynecologist in a cervical cytology  
22 screening program in rural China, where no regional or national databases were available,  
23 enabled us to estimate the prevalence and risk factors of hysterectomy in this area.  
24  
25  
26  
27

28  
29 3. The possibility of a response bias of participants may reduce the generalizability of our  
30 findings to a wider population.  
31  
32

33  
34  
35 4. The small number of hysterectomy cases may have affected the precision of our assessment  
36 of the predictors of hysterectomy.  
37  
38  
39  
40  
41  
42  
43  
44  
45  
46  
47  
48  
49  
50  
51  
52  
53  
54  
55  
56  
57  
58  
59  
60



## INTRODUCTION

Hysterectomy is one of the most frequent surgical procedures performed on women in developed countries.<sup>1</sup> The epidemiology of hysterectomy in the female general population is of public health importance because this procedure may affect the population at risk for uterine diseases<sup>2</sup> and it may also be associated with significant socioeconomic and personal consequences when widely performed. Previous studies, mainly undertaken in developed regions, have shown that the prevalence of hysterectomy varies substantially by race and geographic area (4%-40%).<sup>3-7</sup> Education level, age at first birth, parity, number of miscarriages, and other potential risk factors have been inconsistently associated with the risk of hysterectomy.<sup>5, 8-10</sup> The indications for and surgical techniques used for hysterectomy have also been found to differ across regions<sup>1, 4, 11-13</sup>; however, in general, the major indication for hysterectomy is leiomyoma, and the dominant surgical type is abdominal hysterectomy.<sup>1, 14</sup>

Till now, the epidemiology of hysterectomy in developing countries, including China, remains largely unknown. This population-based cross-sectional study, among 3,328 rural Chinese women, seeks to: 1) assess the prevalence and risk factors of hysterectomy; and 2) investigate indications for and types of hysterectomy among identified cases.

## METHODS

### Study population

This population-based survey was part of an ongoing esophageal cancer cohort study in rural Anyang, China.<sup>14</sup> The current investigation utilized a subset including 6 of the 9 target

1  
2  
3  
4 villages which were cluster-sampled in the parent cohort study conducted from 2009 to 2011.  
5  
6 Eligibility criteria for subjects enrolled in this study were as follows: 1) female permanent  
7  
8 residency in the target villages (registered in the China's hukou system); 2) aged 25-69 years;  
9  
10  
11 3) no prior diagnosis of cancer (9 residents were excluded before enrollment because of  
12  
13 self-reported history of cancer including 1 with cervical cancer), mental disorder, or  
14  
15 cardiovascular disease; and 4) no past history of HBV, HCV, or HIV infection. All participants  
16  
17 in this study provided written informed consent. This study was approved by the Institutional  
18  
19 Review Board of the Peking University School of Oncology, China. The methods were  
20  
21 carried out in accordance with the approved guidelines.  
22  
23  
24  
25

## 26 **Measurements**

27  
28 Briefly, hysterectomy status was ascertained by a gynecologist at the time of gynecologic  
29  
30 examination and cytological test. Data on sociodemographic factors, cigarette smoking  
31  
32 (defined as at least one cigarette or more per day for at least one year), alcohol consumption  
33  
34 (defined as the consumption of Chinese liquor two or more times per week for at least one  
35  
36 year), reproductive history, and personal health habits (e.g., genital washing before sexual  
37  
38 intercourse) were collected through face-to-face interviews before gynecologic tests on the  
39  
40 same day. Height and weight were measured by the interviewers.  
41  
42  
43  
44  
45  
46  
47

48 For cases reporting a hysterectomy, the time of the procedure along with the information on  
49  
50 the indications for and surgical techniques used to perform hysterectomy were also recorded.  
51  
52

53 In this study, the modes of hysterectomy were divided into six categories, including total  
54  
55 abdominal hysterectomy (involving removal of the uterus and its attached cervix through an  
56  
57  
58  
59  
60

1  
2  
3  
4 incision in the lower abdomen), subtotal abdominal hysterectomy (involving removal of only  
5  
6 the uterine body, leaving the cervix intact, through an incision in the lower abdomen), vaginal  
7  
8 hysterectomy (involving removal of the uterus via the vagina, without an abdominal incision),  
9  
10 laparoscopic hysterectomy (involving the use of laparoscopy to perform hysterectomy),  
11  
12 radical hysterectomy (involving removal of the uterus and resection of the ventral or lateral  
13  
14 parametria), and other unspecified hysterectomy.  
15  
16  
17

### 18 19 **Statistical analysis**

20  
21  
22 Prevalence estimates along with 95% confidence intervals (CI) were estimated using a null  
23  
24 linear regression model implemented with the Generalized Estimating Equation (GEE) with a  
25  
26 robust sandwich estimator of covariance to adjust for intracluster correlation.<sup>15</sup> The China  
27  
28 2010 Population Census data and the World Health Organization world standard population  
29  
30 data were used for calculating the adjusted prevalence of prior hysterectomy.<sup>16</sup> Potential risk  
31  
32 factors that were statistically significant in univariate GEE regression analyses were entered  
33  
34 in the final multivariate GEE regression models. Significant differences between groups were  
35  
36 quantified by calculating adjusted odds ratios (OR) and 95% confidence intervals (CI). Tests  
37  
38 for linear trends were performed by treating ordered categorical variables as continuous  
39  
40 variables in the GEE regression analyses. Linear regression models were used to determine  
41  
42 whether any variables in the multivariate models were highly collinear. In this study, all  
43  
44 variance inflation factors were below 3.0 and therefore within the acceptable range.  
45  
46  
47  
48  
49  
50

51  
52  
53 Statistical analyses were performed using STATA version 12.0 (STATA Corporation, College  
54  
55 Station, TX, USA). All statistical tests were two-sided at the 0.05 significance level.  
56  
57  
58  
59  
60

## RESULTS

### Participant characteristics

Of 3,849 eligible candidates, 3,328 (86.5%) were enrolled in the study (the other 521 candidates, who were more frequently of younger age, did not participate, mainly because they were employed outside of Anyang). The median age of these 3,328 participants was 43 years. Most subjects were married or cohabiting (95.00%); of the participants, 92.85% had a level of education of less than 9 years, and 88.52% were engaged in farming (Supplementary Table S1). Both cigarette smoking (0.27%) and alcohol consumption (0.21%) were uncommon. Approximately one half of the women were overweight (31.40%) or obese (18.66%), 43.27% reported menarche at the age of  $\leq 15$  years, 39.84% had their first birth at the age of  $\leq 22$  years, 37.71% had a parity  $> 2$ , 43.66% reported having a history of fetal loss, 77.34% used an intrauterine contraceptive device, 37.89% reported having had a tubal ligation, and 8.80% had a history of post-intercourse bleeding.

### Prevalence and risk factors for hysterectomy

The overall prevalence of prior hysterectomy was 3.31% (110/3328, 95% CI: 2.49-4.12). Adjusted estimates of prevalence standardized by the age structure of the female population of China's 2010 Census and by the age distribution of the World Health Organization world standard population of 2001 were 3.21% and 3.03% respectively. Figure 1 shows the prevalence of prior hysterectomy according to five-year age groups. Among women age 25-39, 0.33% (4/1214) had no uterus (age25-29: 0.32%; age 30-34: 0.52%; age 35-39: 0.19%).

1  
2  
3  
4 The percentage rose to 7.22% (27/374) among women age 45-49. After age 50, the prevalence  
5  
6 of prior hysterectomy declined somewhat (Figure 1). Women above the age of 40 years had a  
7  
8 higher prevalence of prior hysterectomy compared to those aged 25-39 years (5.01 % vs.  
9  
10 0.33%, data not shown). Obesity was marginally related with a higher risk of hysterectomy  
11  
12 (Adjusted OR=1.59; 95% CI, 0.99-2.56; body mass index (BMI)  $\geq 28.0$  vs.  $18.5 \leq \text{BMI} <$   
13  
14 24.0) (Table 1). History of prior pregnancy loss conferred a greater risk for hysterectomy  
15  
16 (Adjusted OR=1.51; 95% CI, 1.02-2.23) (Table 1).  
17  
18  
19  
20

### 21 22 **Indications and surgical types for hysterectomy**

23  
24 A total of 75 (68.18%, 75/110) cases provided further information on hysterectomy, with  
25  
26 mean age at time of hysterectomy of 44 years (standard deviation: 7.6 years; range: 27-66  
27  
28 years) (Supplementary Figure S1). Of these 75 cases, 70.67% (53/75) had a hysterectomy  
29  
30 performed for leiomyoma, 10.67% (8/75) had a hysterectomy performed for dysfunctional  
31  
32 uterine bleeding, 1.33% (1/75) had a hysterectomy performed for cervical cancer, and 6.67%  
33  
34 (5/75) had a hysterectomy performed for other indications (Table 2). Total abdominal  
35  
36 hysterectomy was the most common surgical technique (84.00%, 63/75), while other methods  
37  
38 such as vaginal hysterectomy (2.67%, 2/75) and laparoscopic hysterectomy (1.33%, 1/75)  
39  
40 each accounted for  $\leq 3\%$  of the total hysterectomies.  
41  
42  
43  
44  
45  
46  
47  
48  
49  
50

### 51 52 **DISCUSSION**

53  
54 To our knowledge, this is the first study to demonstrate the prevalence of and factors  
55  
56 associated with hysterectomy in a general population in rural China. Data from this study  
57  
58  
59  
60

1  
2  
3  
4 demonstrated that rural Chinese women had a low prevalence of hysterectomy. Obesity and  
5  
6 history of prior pregnancy loss were associated with greater odds of hysterectomy. The most  
7  
8 common indication for hysterectomy was leiomyoma, and the predominant procedure  
9  
10 performed was abdominal hysterectomy. This investigation expands our knowledge about the  
11  
12 epidemiological profile of hysterectomy in a low-income setting.  
13  
14

15  
16  
17 The overall prevalence of hysterectomy (3.3%) in our study was considerably lower than  
18  
19 previous findings from studies conducted in developed countries such as the United States  
20  
21 (26.2%), Ireland (22.2%), and Australia (22.0%)<sup>17-20</sup>, but closer to that identified in Taiwan  
22  
23 (8.8%) and Singapore (7.5%).<sup>21,22</sup> Data on hysterectomy is limited in developing settings. Our  
24  
25 estimated prevalence was in the lower range reported by community-based studies from low-  
26  
27 and middle-income countries such as India, El Salvador and Jordan (1.7%-9.8%)<sup>3,23-30</sup>, similar  
28  
29 to percentage reported among women textile workers in Shanghai, China (3.9%).<sup>31</sup> The low  
30  
31 hysterectomy prevalence in this study population may be due to various reasons including  
32  
33 limited availability of gynecology services, poor access to public/private sectors, and fear of  
34  
35 surgical operations. Additionally, low affordability of medical care can be another explanation  
36  
37 for the low prevalence. Based on data of China's National Health Survey in 2003, more than  
38  
39 one-third of those who did not seek medical care while sick and over two-thirds of those who  
40  
41 refused hospitalization after professional referral reported 'excessive cost' as the major factor  
42  
43 influencing their decisions.<sup>32</sup> The cultural norms associated with fertility-preserving treatment  
44  
45 may also have contributed to the relatively lower prevalence of hysterectomy.<sup>7,33</sup> The uterus,  
46  
47 as the childbearing organ, is seen as the essence of womanhood in China. Some individuals  
48  
49 may feel that they are no longer women after hysterectomy. Indeed, one previous study  
50  
51  
52  
53  
54  
55  
56  
57  
58  
59  
60

1  
2  
3  
4 showed that Chinese-American women who were educated in China and presumably less  
5  
6 acculturated into the American “hysterectomy-prone” culture had a low hysterectomy rate.<sup>34</sup>  
7

8  
9 Although the overall prevalence of hysterectomy was generally lower than the previously  
10  
11 reported rates in high-resource regions, the pattern of the age distribution of prior  
12  
13 hysterectomy prevalence was consistently similar.<sup>4</sup> The percentage of prior hysterectomy  
14  
15 started to increase in women aged 40-49 years and thereafter remained relatively stable,  
16  
17 which could be due to the sharp increase in hysterectomy incidence rates in this age group.<sup>4,35</sup>  
18  
19

20  
21 In support of this reasoning, we observed that the average age at hysterectomy was 44 years  
22  
23 and more than one-half of all hysterectomies were done in women age 40-49 in this study.  
24

25  
26 According to previous investigations, this increase may be driven by the high occurrence of  
27  
28 uterine leiomyoma, the main indication for surgically removing the uterus, among women  
29  
30 aged 40-49 years.<sup>35</sup> Approximately one quarter of hysterectomies were performed in women  
31  
32 younger than 40 years of age in this study. Evidence on the long-term side effects of  
33  
34 hysterectomy suggests that hysterectomies, especially those performed at young age, are  
35  
36 associated with earlier onset of menopause and higher risk of cardiovascular disease, urinary  
37  
38 incontinence and problems with sexual function.<sup>36-39</sup> Research is required across China to  
39  
40 monitor trends and track long-term health effects of hysterectomy.  
41  
42  
43  
44  
45

46  
47 In terms of predictors for hysterectomy, it should be noted that data on sociodemographic  
48  
49 factors and behavioral characteristics as well as information about BMI status were only  
50  
51 gathered at the time of interview, hence whether there was any change in these questionnaire  
52  
53 data before or after a hysterectomy, if performed, is unknown. The following discussion was  
54  
55 based on the assumption that the information of aforementioned variables remained  
56  
57  
58  
59  
60

1  
2  
3  
4 unchanged before the interview. In this study, prior pregnancy loss was associated with  
5  
6 greater odds of hysterectomy; this finding is consistent with previous reports.<sup>5,9,40</sup> Induced  
7  
8 abortions have been commonly used in China since the 1970s as part of the national family  
9  
10 planning programme. According to surveys conducted in China, approximately 50% of  
11  
12 women had prior abortions, primarily aiming to limit family size.<sup>41,42</sup> Complications such as  
13  
14 uterine perforation resulting from surgical abortion may lead to the application of  
15  
16 hysterectomy as a treatment option.<sup>43</sup> In addition to being a risk factor, pregnancy loss may  
17  
18 also be a reflection of uterine dysfunction that leads to an indication for hysterectomy. In  
19  
20 terms of schooling, lower education level has been associated with a higher risk of  
21  
22 hysterectomy, however, this association seems to vary by geographic location.<sup>2,12,40,44,45</sup> In  
23  
24 this study, no correlation was found between education level and hysterectomy. Whether this  
25  
26 null risk estimate was a true lack of association or merely due to insufficient statistical power  
27  
28 because of the small number of hysterectomy cases and low proportion of women with high  
29  
30 education levels included in our analysis is unclear. Concerning BMI, a higher hysterectomy  
31  
32 frequency was observed in obese women in this study, confirming findings from other studies.  
33  
34  
35  
36  
37  
38  
39  
40  
41  
42  
43  
44  
45  
46  
47  
48  
49  
50  
51  
52  
53  
54  
55  
56  
57  
58  
59  
60

<sup>46</sup> The correlation between obesity and hysterectomy can be partially explained by the fact that obesity elevates the risk of many gynecological conditions that may result in hysterectomy.<sup>47</sup> For instance, obesity has been reported to be associated with pelvic organ prolapse and uterine fibroids, which are common indications for hysterectomy.<sup>48</sup> Obese women are also more likely to develop endometrial carcinomas and pelvic inflammatory diseases, which are less common indications for hysterectomy.<sup>47</sup> Again, however, whether BMI status varied with undergoing hysterectomy is not determinable from the data at hand.



1  
2  
3  
4 Further studies with larger sample sizes are warranted to validate the factors affecting  
5  
6 hysterectomy.  
7

8  
9 Similar to reports from Taiwan<sup>6</sup> and Western countries,<sup>35, 40</sup> leiomyoma of the uterus  
10  
11 predominated among the medical conditions leading to hysterectomy in this study population.  
12

13  
14 Among women undergoing hysterectomy, abdominal hysterectomy was the most frequently  
15  
16 performed procedure, also in agreement with most previous studies.<sup>1, 4</sup> However, the  
17  
18 frequencies at which different types of hysterectomies were performed have been found to  
19  
20 vary markedly across populations and over time, probably due to differences in healthcare  
21  
22 resources, surgeon experience, and patient attitudes.<sup>4, 17, 49</sup> According to a Cochrane review of  
23  
24 studies mainly conducted in Western countries, vaginal hysterectomy, which has become  
25  
26 more widely performed, appeared to be superior to laparoscopic and abdominal hysterectomy  
27  
28 for benign diseases, as it has been associated with a speedier return to normal activities due to  
29  
30 smaller incisions.<sup>49</sup> However, there is limited evidence about the changes in hysterectomy  
31  
32 rates over time and the relative superiority of hysterectomy approaches for addressing benign  
33  
34 conditions in low-resource settings, and further research in this regard is needed.  
35  
36  
37  
38  
39  
40  
41

42  
43 As regional or national databases in rural China are not as readily available as they are in  
44  
45 developed countries, the use of hysterectomy status data ascertained by a gynecologist in a  
46  
47 cervical cytology screening program among rural Chinese women enabled us to evaluate the  
48  
49 prevalence and predictors of hysterectomy in this area. Thus, one of the main strengths of this  
50  
51 study is the population-based nature and low-resource setting. The limitations of this study are  
52  
53 as follows. First, the possibility of a selection bias (e.g. bias introduced by exclusion of  
54  
55 individuals with a prior history of cervical cancer) and response bias of participants may  
56  
57  
58  
59  
60

1  
2  
3  
4 reduce the generalizability of our findings to a wider population. Second, self-reported  
5  
6 maternal and reproductive characteristics may be subject to recall bias. Third, the small  
7  
8 number of hysterectomy cases may have affected the precision of our assessment of the  
9  
10 predictors of hysterectomy. Finally, due to the cross-sectional nature of this study, a temporal  
11  
12 relationship cannot be inferred. Despite these limitations, our study still provides baseline  
13  
14 information on the prevalence and predictors of hysterectomy, as well as indications for and  
15  
16 procedures used in hysterectomies in rural China.  
17  
18  
19

20  
21  
22 In summary, rural Chinese women had a relatively low prevalence of hysterectomy, which  
23  
24 were largely performed abdominally for leiomyoma. Older age, obesity and history of prior  
25  
26 fetal loss were associated with increased risk of hysterectomy among this study population.  
27  
28 These findings provide insights into the hysterectomy epidemiology in lower-resource areas.  
29  
30 Further studies are needed to monitor the trend of incidence rate of hysterectomy and modes  
31  
32 of surgery over time.  
33  
34  
35  
36  
37  
38  
39

#### 40 **CONTRIBUTORS**

41  
42  
43 YK and HC were involved in the design and conducting of the survey. YP, YL, FL, QD, XL,  
44  
45 ML, ZH, YL, JL, TN, CG, RX and LZ were involved in conducting the field work. FL and CZ  
46  
47 performed the statistical analyses and wrote the manuscript text. All authors reviewed the  
48  
49 manuscript.  
50  
51  
52  
53  
54  
55  
56  
57

#### 58 **ETHICAL APPROVAL AND INFORMED CONSENT**

1  
2  
3  
4 The study was approved by the Institutional Review Board of the School of Oncology, Peking  
5  
6 University (Approval number: 2006020). All participants provided written informed consent.  
7  
8  
9 The methods were carried out in accordance with the approved guidelines.  
10  
11  
12  
13

## 14 15 **FUNDING**

16  
17  
18 This work was supported by the Beijing Municipal Science and Technology Commission  
19  
20 [grant number Z141100002114046]; the Charity Project of National Ministry of Health [grant  
21  
22 number 201202014]; the "863" Key Projects of National Ministry of Science and Technology  
23  
24 Grant [grant numbers 2012AA02A209 and 2012AA022502]; and the Natural Science  
25  
26 Foundation of China [grant number 81502855].  
27  
28  
29  
30  
31  
32  
33

## 34 35 **DATA SHARING**

36  
37 No additional data available.  
38  
39  
40  
41  
42

## 43 44 **CONFLICT OF INTEREST**

45  
46 The authors declare they have no conflict of interest with respect to this research study and  
47  
48 paper.  
49  
50  
51  
52  
53  
54

## 55 56 **ACKNOWLEDGEMENTS**

1  
2  
3  
4  
5  
6  
7  
8  
9  
10  
11  
12  
13  
14  
15  
16  
17  
18  
19  
20  
21  
22  
23  
24  
25  
26  
27  
28  
29  
30  
31  
32  
33  
34  
35  
36  
37  
38  
39  
40  
41  
42  
43  
44  
45  
46  
47  
48  
49  
50  
51  
52  
53  
54  
55  
56  
57  
58  
59  
60

We thank Dr. Robert S. Burk for editing and correction of this manuscript.

For peer review only

## REFERENCES

1. Garry R. The future of hysterectomy. *BJOG : an international journal of obstetrics and gynaecology*. 2005 Feb;112(2):133-9.
2. Koepsell TD, Weiss NS, Thompson DJ, Martin DP. Prevalence of prior hysterectomy in the Seattle-Tacoma area. *Am J Public Health*. 1980 Jan;70(1):40-7.
3. Barghouti FF, Yasein NA, Jaber RM, Hatamleh LN, Takruri AH. Prevalence and risk factors of urinary incontinence among Jordanian women: impact on their life. *Health Care Women Int*. 2013;34(11):1015-23.
4. Merrill RM. Hysterectomy surveillance in the United States, 1997 through 2005. *Medical science monitor : international medical journal of experimental and clinical research*. 2008 Jan;14(1):CR24-31.
5. Dharmalingam A, Pool I, Dickson J. Biosocial determinants of hysterectomy in New Zealand. *Am J Public Health*. 2000 Sep;90(9):1455-8.
6. Chang C, Mao CL, Hu YH. Prevalence of hysterectomy of Chinese women in Taiwan. *Int J Gynaecol Obstet*. 1996 Jan;52(1):73-4.
7. Stang A, Merrill RM, Kuss O. Hysterectomy in Germany: a DRG-based nationwide analysis, 2005-2006. *Deutsches Arzteblatt international*. 2011 Jul;108(30):508-14.
8. Stang A, Kluttig A, Moebus S, Volzke H, Berger K, Greiser KH, et al. Educational level, prevalence of hysterectomy, and age at amenorrhoea: a cross-sectional analysis of 9536 women from six population-based cohort studies in Germany. *BMC women's health*. 2014;14:10.
9. Zhang Y, Lee ET, Cowan LD, North KE, Wild RA, Howard BV. Hysterectomy prevalence and cardiovascular disease risk factors in American Indian women. *Maturitas*. 2005 Nov-Dec;52(3-4):328-36.
10. Desai S, Campbell OM, Sinha T, Mahal A, Cousens S. Incidence and determinants of hysterectomy in a low-income setting in Gujarat, India. *Health policy and planning*. 2016 Aug 6.
11. Weaver F, Hynes D, Goldberg JM, Khuri S, Daley J, Henderson W. Hysterectomy in Veterans Affairs Medical Centers. *Obstet Gynecol*. 2001 Jun;97(6):880-4.
12. Byles JE, Mishra G, Schofield M. Factors associated with hysterectomy among women in Australia. *Health & place*. 2000 Dec;6(4):301-8.
13. DeCherney AH, Bachmann G, Isaacson K, Gall S. Postoperative fatigue negatively impacts the

- 1  
2  
3  
4  
5  
6  
7  
8  
9  
10  
11  
12  
13  
14  
15  
16  
17  
18  
19  
20  
21  
22  
23  
24  
25  
26  
27  
28  
29  
30  
31  
32  
33  
34  
35  
36  
37  
38  
39  
40  
41  
42  
43  
44  
45  
46  
47  
48  
49  
50  
51  
52  
53  
54  
55  
56  
57  
58  
59  
60
- daily lives of patients recovering from hysterectomy. *Obstet Gynecol.* 2002 Jan;99(1):51-7.
14. Liu F, Guo F, Zhou Y, He Z, Tian X, Guo C, et al. The Anyang Esophageal Cancer Cohort Study: study design, implementation of fieldwork, and use of computer-aided survey system. *PLoS One.* 2012;7(2):e31602.
15. Zeger SL, Liang KY. Longitudinal data analysis for discrete and continuous outcomes. *Biometrics.* 1986 Mar;42(1):121-30.
16. Ahmad OB, Boschi-Pinto C, Lopez AD, Murray CJ, Lozano R, Inoue M. GPE discussion paper series: No. 31: Age standardization of rates: a new WHO standard. World Health Organization. 2001.
17. Spilsbury K, Semmens JB, Hammond I, Bolck A. Persistent high rates of hysterectomy in Western Australia: a population-based study of 83 000 procedures over 23 years. *BJOG : an international journal of obstetrics and gynaecology.* 2006 Jul;113(7):804-9.
18. Wilcox LS, Koonin LM, Pokras R, Strauss LT, Xia Z, Peterson HB. Hysterectomy in the United States, 1988-1990. *Obstet Gynecol.* 1994 Apr;83(4):549-55.
19. McPherson K, Strong PM, Epstein A, Jones L. Regional variations in the use of common surgical procedures: within and between England and Wales, Canada and the United States of America. *Social science & medicine Part A, Medical sociology.* 1981 May;15(3 Pt 1):273-88.
20. van Keep PA, Wildemeersch D, Lehert P. Hysterectomy in six European countries. *Maturitas.* 1983 Aug;5(2):69-75.
21. Hsieh CH, Lee MS, Lee MC, Kuo TC, Hsu CS, Chang ST. Risk factors for urinary incontinence in Taiwanese women aged 20-59 years. *Taiwan J Obstet Gynecol.* 2008 Jun;47(2):197-202.
22. Lam JS, Tay WT, Aung T, Saw SM, Wong TY. Female reproductive factors and major eye diseases in Asian women -the Singapore Malay Eye Study. *Ophthalmic epidemiology.* 2014 Apr;21(2):92-8.
23. Kaur S, Walia I, Singh A. How menopause affects the lives of women in suburban Chandigarh, India. *Climacteric : the journal of the International Menopause Society.* 2004 Jun;7(2):175-80.
24. Shakhathreh FM. Epidemiology of urinary incontinence in Jordanian women. *Saudi Med J.* 2005 May;26(5):830-5.
25. Patel V, Tanksale V, Sahasrabhojane M, Gupte S, Nevrekar P. The burden and determinants of dysmenorrhoea: a population-based survey of 2262 women in Goa, India. *BJOG : an international journal of obstetrics and gynaecology.* 2006 Apr;113(4):453-63.
26. Ozel B, Borchelt AM, Cimino FM, Cremer M. Prevalence and risk factors for pelvic floor symptoms

- 1  
2  
3 in women in rural El Salvador. *Int Urogynecol J Pelvic Floor Dysfunct*. 2007 Sep;18(9):1065-9.  
4  
5 27. Singh A, Arora AK. Why Hysterectomy Rate are Lower in India. *Indian journal of community*  
6  
7 *medicine : official publication of Indian Association of Preventive & Social Medicine*. 2008  
8  
9 Jul;33(3):196-7.  
10  
11 28. Bhasin SK, Roy R, Agrawal S, Sharma R. An epidemiological study of major surgical procedures in  
12  
13 an urban population of East delhi. *The Indian journal of surgery*. 2011 Apr;73(2):131-5.  
14  
15 29. Desai S, Sinha T, Mahal A. Prevalence of hysterectomy among rural and urban women with and  
16  
17 without health insurance in Gujarat, India. *Reproductive health matters*. 2011 May;19(37):42-51.  
18  
19 30. Sarna A, Friedland BA, Srikrishnan AK, Katzen LL, Tun W, Abbott SA, et al. Sexually transmitted  
20  
21 infections and reproductive health morbidity in a cohort of female sex workers screened for a  
22  
23 microbicide feasibility study in Nellore, India. *Global journal of health science*. 2013 Feb  
24  
25 24;5(3):139-49.  
26  
27 31. Wong EY, Ray R, Gao DL, Wernli KJ, Li W, Fitzgibbons ED, et al. Reproductive history, occupational  
28  
29 exposures, and thyroid cancer risk among women textile workers in Shanghai, China. *Int Arch Occup*  
30  
31 *Environ Health*. 2006 Mar;79(3):251-8.  
32  
33 32. Liu D, Tsegai D. The New Cooperative Medical Scheme (NCMS) and its implications for access to  
34  
35 health care and medical expenditure: Evidence from rural China. ZEF- Discussion Papers on  
36  
37 Development Policy No 155, Center for Development Research, Bonn. 2011.  
38  
39 33. Broder MS, Kanouse DE, Mittman BS, Bernstein SJ. The appropriateness of recommendations for  
40  
41 hysterectomy. *Obstet Gynecol*. 2000 Feb;95(2):199-205.  
42  
43 34. Powell LH, Meyer P, Weiss G, Matthews KA, Santoro N, Randolph JF, Jr., et al. Ethnic differences in  
44  
45 past hysterectomy for benign conditions. *Womens Health Issues*. 2005 Jul-Aug;15(4):179-86.  
46  
47 35. Jacobson GF, Shaber RE, Armstrong MA, Hung YY. Hysterectomy rates for benign indications.  
48  
49 *Obstet Gynecol*. 2006 Jun;107(6):1278-83.  
50  
51 36. Hunter MS, Gentry-Maharaj A, Ryan A, Burnell M, Lanceley A, Fraser L, et al. Prevalence,  
52  
53 frequency and problem rating of hot flushes persist in older postmenopausal women: impact of age,  
54  
55 body mass index, hysterectomy, hormone therapy use, lifestyle and mood in a cross-sectional cohort  
56  
57 study of 10,418 British women aged 54-65. *BJOG : an international journal of obstetrics and*  
58  
59 *gynaecology*. 2012 Jan;119(1):40-50.  
60  
61 37. Hoga LA, Higashi AB, Sato PM, Bozzini N, Baracat EC, Manganiello A. Psychosexual perspectives of

1  
2  
3 the husbands of women treated with an elective hysterectomy. *Health Care Women Int.*  
4  
5 2012;33(9):799-813.

6  
7 38. Farquhar CM, Sadler L, Harvey SA, Stewart AW. The association of hysterectomy and menopause:  
8  
9 a prospective cohort study. *BJOG : an international journal of obstetrics and gynaecology.* 2005  
10  
11 Jul;112(7):956-62.

12  
13 39. Yeh JS, Cheng HM, Hsu PF, Sung SH, Liu WL, Fang HL, et al. Hysterectomy in young women  
14  
15 associates with higher risk of stroke: a nationwide cohort study. *Int J Cardiol.* 2013 Oct  
16  
17 03;168(3):2616-21.

18  
19 40. Brett KM, Marsh JV, Madans JH. Epidemiology of hysterectomy in the United States: demographic  
20  
21 and reproductive factors in a nationally representative sample. *Journal of women's health / the official*  
22  
23 *publication of the Society for the Advancement of Women's Health Research.* 1997 Jun;6(3):309-16.

24  
25 41. Sanderson M, Shu XO, Jin F, Dai Q, Wen W, Hua Y, et al. Abortion history and breast cancer risk:  
26  
27 results from the Shanghai Breast Cancer Study. *Int J Cancer.* 2001 Jun 15;92(6):899-905.

28  
29 42. Ye Z, Gao DL, Qin Q, Ray RM, Thomas DB. Breast cancer in relation to induced abortions in a  
30  
31 cohort of Chinese women. *Br J Cancer.* 2002 Oct 21;87(9):977-81.

32  
33 43. Grimes DA, Flock ML, Schulz KF, Cates W, Jr. Hysterectomy as treatment for complications of legal  
34  
35 abortion. *Obstet Gynecol.* 1984 Apr;63(4):457-62.

36  
37 44. Treloar SA, Do KA, O'Connor VM, O'Connor DT, Yeo MA, Martin NG. Predictors of hysterectomy:  
38  
39 an Australian study. *Am J Obstet Gynecol.* 1999 Apr;180(4):945-54.

40  
41 45. Nagata C, Takatsuka N, Kawakami N, Shimizu H. Soy product intake and premenopausal  
42  
43 hysterectomy in a follow-up study of Japanese women. *Eur J Clin Nutr.* 2001 Sep;55(9):773-7.

44  
45 46. Fitzgerald DM, Berecki-Gisolf J, Hockey RL, Dobson AJ. Hysterectomy and weight gain.  
46  
47 *Menopause.* 2009 Mar-Apr;16(2):279-85.

48  
49 47. Goodman MT, Hankin JH, Wilkens LR, Lyu LC, McDuffie K, Liu LQ, et al. Diet, body size, physical  
50  
51 activity, and the risk of endometrial cancer. *Cancer Res.* 1997 Nov 15;57(22):5077-85.

52  
53 48. Pandey S, Bhattacharya S. Impact of obesity on gynecology. *Womens Health (Lond).* 2010  
54  
55 Jan;6(1):107-17.

56  
57 49. Aarts JW, Nieboer TE, Johnson N, Tavender E, Garry R, Mol BW, et al. Surgical approach to  
58  
59 hysterectomy for benign gynaecological disease. *Cochrane Database Syst Rev.* 2015;8:CD003677.  
60



## TABLES

**Table 1.** Prevalence of and risk factors for hysterectomy among women in rural Anyang, China, 2009-2011

| Variables                                          | Hysterectomy, | No hysterectomy, | Crude OR (95% CI)   | Adjusted OR (95% CI) <sup>a</sup> | P value <sup>a</sup> |
|----------------------------------------------------|---------------|------------------|---------------------|-----------------------------------|----------------------|
|                                                    | No. (%)       | No. (%)          |                     |                                   |                      |
| Total                                              | 110 (3.31)    | 3,218 (96.69)    |                     |                                   |                      |
| Age (years)                                        |               |                  |                     |                                   |                      |
| 25-40                                              | 4 (3.64)      | 892 (27.72)      | 1.00                | 1.00                              |                      |
| 41-56                                              | 66 (60.00)    | 1,527 (47.45)    | 9.52 (3.53, 25.64)  | 7.82 (2.87, 21.31)                | <0.001               |
| 57-69                                              | 40 (36.36)    | 799 (24.83)      | 11.04 (4.02, 30.31) | 10.10 (3.48, 29.32)               | <0.001               |
| <i>P</i> <sub>trend</sub> <sup>b</sup>             |               |                  | <0.001              | <0.001                            |                      |
| Marital status                                     |               |                  |                     |                                   |                      |
| Never married, divorced, separated or widowed      | 5 (4.63)      | 177 (5.59)       | 1.00                |                                   |                      |
| Married or cohabiting                              | 103 (95.37)   | 2,992 (94.41)    | 1.24 (0.50, 3.12)   |                                   |                      |
| Type of employment                                 |               |                  |                     |                                   |                      |
| Farming                                            | 101 (93.52)   | 2,845 (89.78)    | 1.00                |                                   |                      |
| Non-farming                                        | 7 (6.48)      | 324 (10.22)      | 0.61 (0.28, 1.32)   |                                   |                      |
| Education level                                    |               |                  |                     |                                   |                      |
| Illiteracy (<1 year) or primary school (1-6 years) | 72 (66.67)    | 1,814 (57.33)    | 1.00                |                                   |                      |
| Junior high school (7-9 years)                     | 31 (28.70)    | 1,173 (37.07)    | 0.67 (0.44, 1.03)   |                                   |                      |
| Senior high school or above (>9 years)             | 5 (4.63)      | 177 (5.59)       | 0.71 (0.28, 1.79)   |                                   |                      |
| <i>P</i> <sub>trend</sub> <sup>b</sup>             |               |                  | 0.085               |                                   |                      |
| Household annual income, RMB                       |               |                  |                     |                                   |                      |
| ≤10,000                                            | 23 (35.94)    | 511 (30.42)      | 1.00                |                                   |                      |
| 10,001-29,999                                      | 17 (26.56)    | 534 (31.79)      | 0.71 (0.37, 1.34)   |                                   |                      |
| ≥30,000                                            | 24 (37.50)    | 635 (37.80)      | 0.86 (0.48, 1.54)   |                                   |                      |
| <i>P</i> <sub>trend</sub> <sup>b</sup>             |               |                  | 0.643               |                                   |                      |
| Cigarette smoking                                  |               |                  |                     |                                   |                      |
| Never                                              | 108 (100.00)  | 3,160 (99.72)    | 1.00                |                                   |                      |

1  
2  
3  
4  
5  
6  
7  
8  
9  
10  
11  
12  
13  
14  
15  
16  
17  
18  
19  
20  
21  
22  
23  
24  
25  
26  
27  
28  
29  
30  
31  
32  
33  
34  
35  
36  
37  
38  
39  
40  
41  
42  
43  
44  
45  
46  
47  
48  
49

|                                          |             |               |                    |                   |       |
|------------------------------------------|-------------|---------------|--------------------|-------------------|-------|
| Ever                                     | 0 (0.00)    | 9 (0.28)      | NE                 |                   |       |
| Alcohol consumption                      |             |               |                    |                   |       |
| Never                                    | 107 (99.07) | 3,163 (99.81) | 1.00               |                   |       |
| Ever                                     | 1 (0.93)    | 6 (0.19)      | 4.89 (0.58, 41.33) |                   |       |
| Body mass index (BMI), Kg/m <sup>2</sup> |             |               |                    |                   |       |
| Normal weight (18.5 ≤ BMI < 24.0)        | 40 (36.70)  | 1,358 (44.42) | 1.00               | 1.00              |       |
| Overweight (24.0 ≤ BMI < 28.0)           | 34 (31.19)  | 1,011 (33.07) | 1.15 (0.72, 1.84)  | 1.06 (0.66, 1.70) | 0.815 |
| Obese (BMI ≥ 28.0)                       | 34 (31.19)  | 587 (19.20)   | 2.01 (1.26, 3.22)  | 1.59 (0.99, 2.56) | 0.054 |
| Underweight (BMI < 18.5)                 | 1 (0.92)    | 101 (3.30)    | 0.35 (0.05, 2.51)  | 0.38 (0.05, 2.94) | 0.355 |
| <i>P</i> <sub>trend</sub> <sup>b</sup>   |             |               | 0.061              | 0.223             |       |
| Age (years) at menarche                  |             |               |                    |                   |       |
| ≤15                                      | 46 (42.99)  | 1,394 (44.45) | 1.00               |                   |       |
| 16-18                                    | 45 (42.06)  | 1,391 (44.36) | 0.98 (0.64, 1.49)  |                   |       |
| ≥19                                      | 16 (14.95)  | 351 (11.19)   | 1.38 (0.77, 2.46)  |                   |       |
| <i>P</i> <sub>trend</sub> <sup>b</sup>   |             |               | 0.437              |                   |       |
| Menstruation                             |             |               |                    |                   |       |
| Regular                                  | 73 (68.22)  | 2,223 (70.80) | 1.00               |                   |       |
| Irregular                                | 34 (31.78)  | 917 (29.20)   | 0.88 (0.58, 1.34)  |                   |       |
| Age (years) at first birth               |             |               |                    |                   |       |
| ≤22                                      | 53 (49.53)  | 1,273 (40.84) | 1.00               |                   |       |
| 23-24                                    | 31 (28.97)  | 1,102 (35.35) | 0.68 (0.43, 1.07)  |                   |       |
| ≥25                                      | 23 (21.50)  | 742 (23.80)   | 0.75 (0.46, 1.23)  |                   |       |
| <i>P</i> <sub>trend</sub> <sup>b</sup>   |             |               | 0.166              |                   |       |
| Parity                                   |             |               |                    |                   |       |
| ≤2                                       | 53 (49.07)  | 1,939 (61.77) | 1.00               | 1.00              |       |
| >2                                       | 55 (50.93)  | 1,200 (38.23) | 1.72 (1.16, 2.53)  | 1.05 (0.67, 1.64) | 0.842 |
| History of fetal loss                    |             |               |                    |                   |       |
| Never                                    | 50 (45.45)  | 1,825 (56.71) | 1.00               | 1.00              |       |
| Ever                                     | 60 (54.55)  | 1,393 (43.29) | 1.56 (1.06, 2.30)  | 1.51 (1.02, 2.23) | 0.038 |

|    |                                           |             |               |                   |
|----|-------------------------------------------|-------------|---------------|-------------------|
| 1  |                                           |             |               |                   |
| 2  |                                           |             |               |                   |
| 3  |                                           |             |               |                   |
| 4  |                                           |             |               |                   |
| 5  |                                           |             |               |                   |
| 6  |                                           |             |               |                   |
| 7  | Use of intrauterine contraceptive devices |             |               |                   |
| 8  | No                                        | 29 (26.85)  | 669 (21.14)   | 1.00              |
| 9  | Yes                                       | 79 (73.15)  | 2,495 (78.86) | 0.72 (0.47, 1.11) |
| 10 | Tubal ligation                            |             |               |                   |
| 11 | No                                        | 63 (58.33)  | 1,948 (61.57) | 1.00              |
| 12 | Yes                                       | 45 (41.67)  | 1,216 (38.43) | 1.15 (0.78, 1.69) |
| 13 | History of cervicitis                     |             |               |                   |
| 14 | Never                                     | 91 (86.67)  | 2,534 (85.18) | 1.00              |
| 15 | Ever                                      | 14 (13.33)  | 441 (14.82)   | 0.89 (0.50, 1.58) |
| 16 | History of vaginitis                      |             |               |                   |
| 17 | Never                                     | 80 (76.19)  | 2,410 (80.95) | 1.00              |
| 18 | Ever                                      | 25 (23.81)  | 567 (19.05)   | 1.32 (0.83, 2.09) |
| 19 | History of pelvic inflammation            |             |               |                   |
| 20 | Never                                     | 104 (96.30) | 2,794 (93.92) | 1.00              |
| 21 | Ever                                      | 4 (3.70)    | 181 (6.08)    | 0.59 (0.21, 1.63) |
| 22 | History of post-intercourse bleeding      |             |               |                   |
| 23 | Never                                     | 98 (91.59)  | 2,856 (90.96) | 1.00              |
| 24 | Ever                                      | 9 (8.41)    | 284 (9.04)    | 0.92 (0.46, 1.84) |
| 25 | Genital washing before sex                |             |               |                   |
| 26 | Rare                                      | 86 (79.63)  | 2,329 (73.52) | 1.00              |
| 27 | Occasional                                | 11 (10.19)  | 400 (12.63)   | 0.75 (0.39, 1.41) |
| 28 | Often                                     | 111 (10.19) | 439 (13.86)   | 0.67 (0.36, 1.28) |
| 29 | $P_{trend}^b$                             |             |               | 0.162             |

33 Abbreviations: OR, odds ratio; CI, confidence interval; GEE, Generalized Estimating Equation; NE, not estimable.

34 <sup>a</sup> Variables that were statistically significant in univariate GEE regression analyses were included in multivariate models. Adjusted ORs, 95% CIs and *P* values were  
 35 calculated by multivariate GEE regression model including age group, body mass index, parity, and history of fetal loss.

36 <sup>b</sup> *P* values for trend were calculated by GEE regression analyses, treating categorical variables as continuous variables.

**Table 2.** Indications for and types of surgery among the 75 hysterectomy cases from rural Anyang, China, 2009-2011

| Procedure                       | Leiomyoma   | Dysfunctional uterine bleeding | Cervical cancer | Other       | Total       |
|---------------------------------|-------------|--------------------------------|-----------------|-------------|-------------|
|                                 | No. (%)     |                                |                 |             |             |
| Total abdominal hysterectomy    | 49 (92.45)  | 8 (100.00)                     | 1 (25.00)       | 5 (50.00)   | 63 (84.00)  |
| Subtotal abdominal hysterectomy | 1 (1.89)    | 0 (0.00)                       | 0 (0.00)        | 1 (10.00)   | 2 (2.67)    |
| Vaginal hysterectomy            | 0 (0.00)    | 0 (0.00)                       | 0 (0.00)        | 2 (20.00)   | 2 (2.67)    |
| Laparoscopic hysterectomy       | 1 (1.89)    | 0 (0.00)                       | 0 (0.00)        | 0 (0.00)    | 1 (1.33)    |
| Radical hysterectomy            | 0 (0.00)    | 0 (0.00)                       | 2 (50.00)       | 0 (0.00)    | 2 (2.67)    |
| Other unspecified hysterectomy  | 2 (3.77)    | 0 (0.00)                       | 1 (25.00)       | 2 (20.00)   | 5 (6.67)    |
| Total                           | 53 (100.00) | 8 (100.00)                     | 4 (100.00)      | 10 (100.00) | 75 (100.00) |

**FIGURE LEGEND**

**Figure 1.** The prevalence of prior hysterectomy (%) according to five-year age groups among 3,328 rural Chinese women, 2009-2011. The numbers of women in the 25-29, 30-34, 35-39, 40-44, 45-49, 50-54, 55-59, 60-64, and 65-69 years age groups were 313, 384, 517, 633, 374, 344, 365, 330, and 68 respectively.

**Supplementary Figure S1.** Age at time of hysterectomy among 75 cases with detailed information on hysterectomy

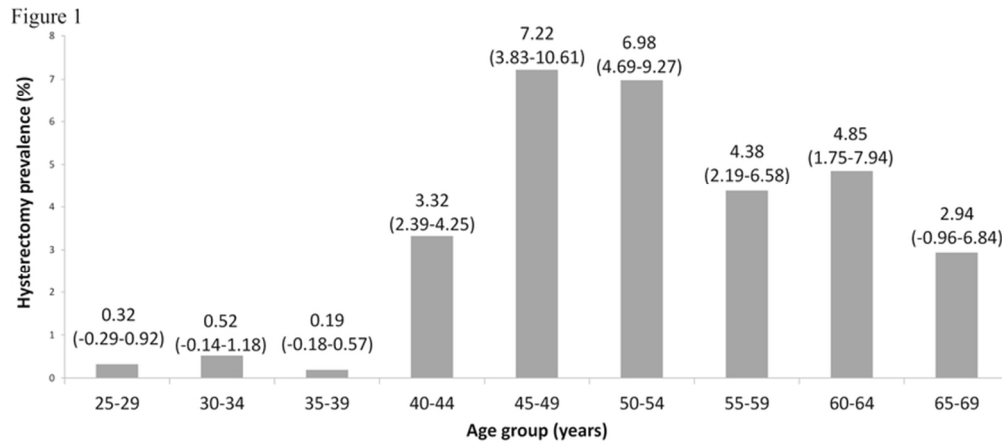

Figure 1. The prevalence of prior hysterectomy (%) according to five-year age groups among 3,328 rural Chinese women, 2009-2011. The numbers of women in the 25-29, 30-34, 35-39, 40-44, 45-49, 50-54, 55-59, 60-64, and 65-69 years age groups were 313, 384, 517, 633, 374, 344, 365, 330, and 68 respectively.

74x32mm (300 x 300 DPI)

1  
2  
3  
4 **Supporting Information**  
5  
6  
7  
8

9 **Supplementary Table S1.** Selected characteristics of women included in the study of  
10 hysterectomy in rural Anyang, China, 2009-2011  
11

| Variables                                          | No. (%)        |
|----------------------------------------------------|----------------|
| Total                                              | 3,328 (100.00) |
| Age (years)                                        |                |
| Median (Interquartile range)                       | 43 (36-54)     |
| 25-40                                              | 896 (26.92)    |
| 41-56                                              | 1,593 (47.87)  |
| 57-69                                              | 839 (25.21)    |
| Marital status                                     |                |
| Never married, divorced, separated or widowed      | 182 (5.47)     |
| Married or cohabiting                              | 3,095 (95.00)  |
| Unknown                                            | 51 (1.53)      |
| Type of employment                                 |                |
| Farming                                            | 2,946 (88.52)  |
| Non-farming                                        | 331 (9.95)     |
| Unknown                                            | 51 (1.53)      |
| Education level                                    |                |
| Illiteracy (<1 year) or primary school (1-6 years) | 1,886 (56.67)  |
| Junior high school (7-9 years)                     | 1,204 (36.18)  |
| Senior high school or above (>9 years)             | 182 (5.47)     |
| Unknown                                            | 56 (1.68)      |
| Household annual income, RMB                       |                |
| ≤10,000                                            | 534 (16.05)    |
| 10,001-29,999                                      | 551 (16.56)    |
| ≥30,000                                            | 659 (19.80)    |
| Unknown                                            | 1,584 (47.60)  |
| Cigarette smoking                                  |                |
| Never                                              | 3,268 (98.20)  |
| Ever                                               | 9 (0.27)       |
| Unknown                                            | 51 (1.53)      |
| Alcohol consumption                                |                |
| Never                                              | 3,270 (98.26)  |
| Ever                                               | 7 (0.21)       |
| Unknown                                            | 51 (1.53)      |
| Body mass index (BMI), Kg/m <sup>2</sup>           |                |
| Normal weight (18.5 ≤ BMI < 24.0)                  | 1,398 (42.01)  |
| Overweight (24.0 ≤ BMI < 28.0)                     | 1,045 (31.40)  |
| Obese (BMI ≥ 28.0)                                 | 621 (18.66)    |

|    |                                          |               |
|----|------------------------------------------|---------------|
| 1  |                                          |               |
| 2  |                                          |               |
| 3  | Underweight (BMI < 18.5)                 | 102 (3.06)    |
| 4  | Unknown                                  | 162 (4.87)    |
| 5  |                                          |               |
| 6  | Age (years) at menarche                  |               |
| 7  | ≤15                                      | 1,440 (43.27) |
| 8  | 16-18                                    | 1,436 (43.15) |
| 9  | ≥19                                      | 367 (11.03)   |
| 10 | Unknown                                  | 85 (2.55)     |
| 11 |                                          |               |
| 12 | Menstruation                             |               |
| 13 | Regular                                  | 2,296 (68.99) |
| 14 | Irregular                                | 951 (28.58)   |
| 15 | Unknown                                  | 81 (2.43)     |
| 16 |                                          |               |
| 17 | Age (years) at first birth               |               |
| 18 | ≤22                                      | 1,326 (39.84) |
| 19 | 23-24                                    | 1,133 (34.04) |
| 20 | ≥25                                      | 765 (22.99)   |
| 21 | Unknown                                  | 104 (3.13)    |
| 22 |                                          |               |
| 23 | Parity                                   |               |
| 24 | ≤ 2                                      | 1,992 (59.86) |
| 25 | > 2                                      | 1,255 (37.71) |
| 26 | Unknown                                  | 81 (2.43)     |
| 27 |                                          |               |
| 28 | History of fetal loss                    |               |
| 29 | Never                                    | 1,875 (56.34) |
| 30 | Ever                                     | 1,453 (43.66) |
| 31 | Unknown                                  |               |
| 32 |                                          |               |
| 33 | Use of intrauterine contraceptive device |               |
| 34 | No                                       | 698 (20.97)   |
| 35 | Yes                                      | 2,574 (77.34) |
| 36 | Unknown                                  | 56 (1.68)     |
| 37 |                                          |               |
| 38 | Tubal ligation                           |               |
| 39 | No                                       | 2,011 (60.43) |
| 40 | Yes                                      | 1,261 (37.89) |
| 41 | Unknown                                  | 56 (1.68)     |
| 42 |                                          |               |
| 43 | History of cervicitis                    |               |
| 44 | Never                                    | 2,625 (78.88) |
| 45 | Ever                                     | 455 (13.67)   |
| 46 | Unknown                                  | 248 (7.45)    |
| 47 |                                          |               |
| 48 | History of vaginitis                     |               |
| 49 | Never                                    | 2,490 (74.82) |
| 50 | Ever                                     | 592 (17.79)   |
| 51 | Unknown                                  | 246 (7.39)    |
| 52 |                                          |               |
| 53 | History of pelvic inflammation           |               |
| 54 | Never                                    | 2,898 (87.08) |
| 55 | Ever                                     | 185 (5.56)    |
| 56 | Unknown                                  | 245 (7.36)    |
| 57 |                                          |               |
| 58 |                                          |               |
| 59 |                                          |               |
| 60 |                                          |               |



|    |                                      |               |
|----|--------------------------------------|---------------|
| 1  |                                      |               |
| 2  |                                      |               |
| 3  |                                      |               |
| 4  | History of post-intercourse bleeding |               |
| 5  | Never                                | 2,954 (88.76) |
| 6  | Ever                                 | 293 (8.80)    |
| 7  | Unknown                              | 81 (2.43)     |
| 8  |                                      |               |
| 9  | Genital washing before sex           |               |
| 10 | Rare                                 | 2,415 (72.57) |
| 11 | Occasional                           | 411 (12.35)   |
| 12 | Often                                | 450 (13.52)   |
| 13 | Unknown                              | 52 (1.56)     |
| 14 |                                      |               |
| 15 | <hr/>                                |               |
| 16 |                                      |               |
| 17 |                                      |               |
| 18 |                                      |               |
| 19 |                                      |               |
| 20 |                                      |               |
| 21 |                                      |               |
| 22 |                                      |               |
| 23 |                                      |               |
| 24 |                                      |               |
| 25 |                                      |               |
| 26 |                                      |               |
| 27 |                                      |               |
| 28 |                                      |               |
| 29 |                                      |               |
| 30 |                                      |               |
| 31 |                                      |               |
| 32 |                                      |               |
| 33 |                                      |               |
| 34 |                                      |               |
| 35 |                                      |               |
| 36 |                                      |               |
| 37 |                                      |               |
| 38 |                                      |               |
| 39 |                                      |               |
| 40 |                                      |               |
| 41 |                                      |               |
| 42 |                                      |               |
| 43 |                                      |               |
| 44 |                                      |               |
| 45 |                                      |               |
| 46 |                                      |               |
| 47 |                                      |               |
| 48 |                                      |               |
| 49 |                                      |               |
| 50 |                                      |               |
| 51 |                                      |               |
| 52 |                                      |               |
| 53 |                                      |               |
| 54 |                                      |               |
| 55 |                                      |               |
| 56 |                                      |               |
| 57 |                                      |               |
| 58 |                                      |               |
| 59 |                                      |               |
| 60 |                                      |               |

For peer review only

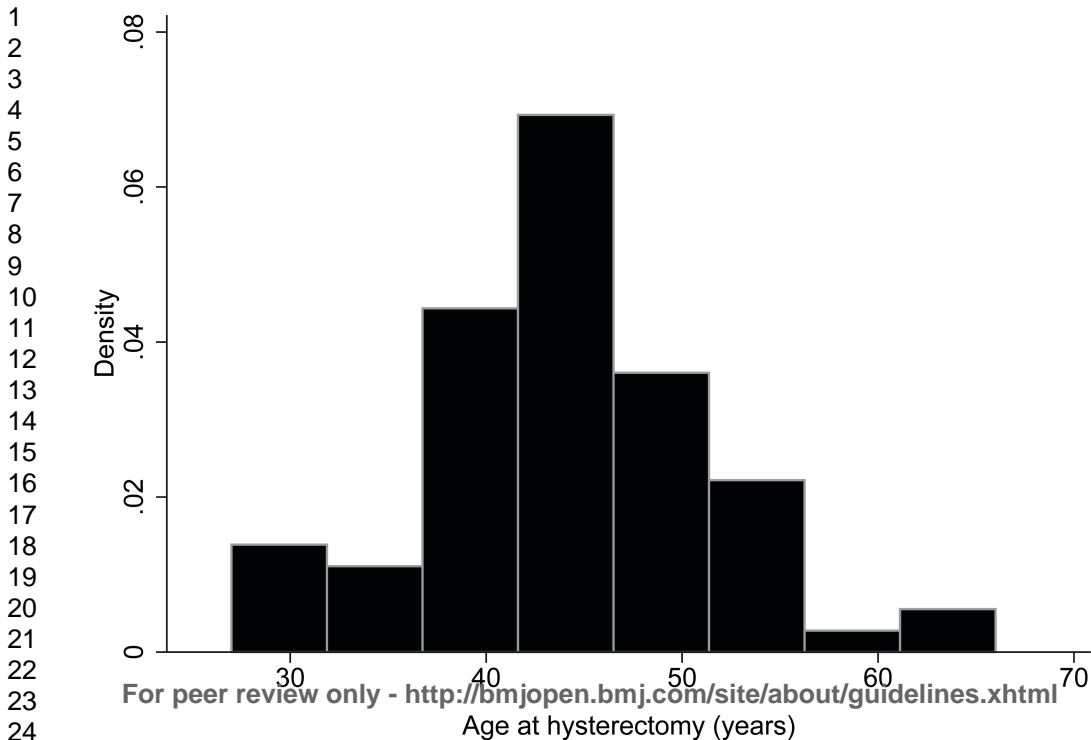

For peer review only - <http://bmjopen.bmj.com/site/about/guidelines.xhtml>

22  
23  
24  
25  
26

STROBE Statement—Checklist of items that should be included in reports of *cross-sectional studies*

|                              | Item No | Recommendation                                                                                                                                                                                               | Reported on page # |
|------------------------------|---------|--------------------------------------------------------------------------------------------------------------------------------------------------------------------------------------------------------------|--------------------|
| <b>Title and abstract</b>    | 1       | (a) Indicate the study's design with a commonly used term in the title or the abstract                                                                                                                       | 1                  |
|                              |         | (b) Provide in the abstract an informative and balanced summary of what was done and what was found                                                                                                          | 3,4                |
| <b>Introduction</b>          |         |                                                                                                                                                                                                              |                    |
| Background/rationale         | 2       | Explain the scientific background and rationale for the investigation being reported                                                                                                                         | 5                  |
| Objectives                   | 3       | State specific objectives, including any prespecified hypotheses                                                                                                                                             | 5                  |
| <b>Methods</b>               |         |                                                                                                                                                                                                              |                    |
| Study design                 | 4       | Present key elements of study design early in the paper                                                                                                                                                      | 5,6                |
| Setting                      | 5       | Describe the setting, locations, and relevant dates, including periods of recruitment, exposure, follow-up, and data collection                                                                              | 5,6                |
| Participants                 | 6       | (a) Give the eligibility criteria, and the sources and methods of selection of participants                                                                                                                  | 6                  |
| Variables                    | 7       | Clearly define all outcomes, exposures, predictors, potential confounders, and effect modifiers. Give diagnostic criteria, if applicable                                                                     | 6                  |
| Data sources/<br>measurement | 8*      | For each variable of interest, give sources of data and details of methods of assessment (measurement). Describe comparability of assessment methods if there is more than one group                         | 6                  |
| Bias                         | 9       | Describe any efforts to address potential sources of bias                                                                                                                                                    | 6                  |
| Study size                   | 10      | Explain how the study size was arrived at                                                                                                                                                                    | 5,6                |
| Quantitative<br>variables    | 11      | Explain how quantitative variables were handled in the analyses. If applicable, describe which groupings were chosen and why                                                                                 | 6,7                |
| Statistical methods          | 12      | (a) Describe all statistical methods, including those used to control for confounding                                                                                                                        | 7                  |
|                              |         | (b) Describe any methods used to examine subgroups and interactions                                                                                                                                          | 7                  |
|                              |         | (c) Explain how missing data were addressed                                                                                                                                                                  |                    |
|                              |         | (d) If applicable, describe analytical methods taking account of sampling strategy                                                                                                                           |                    |
|                              |         | (e) Describe any sensitivity analyses                                                                                                                                                                        |                    |
| <b>Results</b>               |         |                                                                                                                                                                                                              |                    |
| Participants                 | 13*     | (a) Report numbers of individuals at each stage of study—eg numbers potentially eligible, examined for eligibility, confirmed eligible, included in the study, completing follow-up, and analysed            | 8,9                |
|                              |         | (b) Give reasons for non-participation at each stage                                                                                                                                                         | 8,9                |
|                              |         | (c) Consider use of a flow diagram                                                                                                                                                                           |                    |
| Descriptive data             | 14*     | (a) Give characteristics of study participants (eg demographic, clinical, social) and information on exposures and potential confounders                                                                     | 8,9                |
|                              |         | (b) Indicate number of participants with missing data for each variable of interest                                                                                                                          | 8,9                |
| Outcome data                 | 15*     | Report numbers of outcome events or summary measures                                                                                                                                                         | 8,9                |
| Main results                 | 16      | (a) Give unadjusted estimates and, if applicable, confounder-adjusted estimates and their precision (eg, 95% confidence interval). Make clear which confounders were adjusted for and why they were included | 8,9                |

|                          |    |                                                                                                                                                                            |          |
|--------------------------|----|----------------------------------------------------------------------------------------------------------------------------------------------------------------------------|----------|
|                          |    | (b) Report category boundaries when continuous variables were categorized                                                                                                  | 21,22,23 |
|                          |    | (c) If relevant, consider translating estimates of relative risk into absolute risk for a meaningful time period                                                           |          |
| Other analyses           | 17 | Report other analyses done—eg analyses of subgroups and interactions, and sensitivity analyses                                                                             |          |
| <b>Discussion</b>        |    |                                                                                                                                                                            |          |
| Key results              | 18 | Summarise key results with reference to study objectives                                                                                                                   | 9,10     |
| Limitations              | 19 | Discuss limitations of the study, taking into account sources of potential bias or imprecision. Discuss both direction and magnitude of any potential bias                 | 13,14    |
| Interpretation           | 20 | Give a cautious overall interpretation of results considering objectives, limitations, multiplicity of analyses, results from similar studies, and other relevant evidence | 11,12,13 |
| Generalisability         | 21 | Discuss the generalisability (external validity) of the study results                                                                                                      | 13,14    |
| <b>Other information</b> |    |                                                                                                                                                                            |          |
| Funding                  | 22 | Give the source of funding and the role of the funders for the present study and, if applicable, for the original study on which the present article is based              | 15       |

\*Give information separately for exposed and unexposed groups.

**Note:** An Explanation and Elaboration article discusses each checklist item and gives methodological background and published examples of transparent reporting. The STROBE checklist is best used in conjunction with this article (freely available on the Web sites of PLoS Medicine at <http://www.plosmedicine.org/>, Annals of Internal Medicine at <http://www.annals.org/>, and Epidemiology at <http://www.epidem.com/>). Information on the STROBE Initiative is available at [www.strobe-statement.org](http://www.strobe-statement.org).

# BMJ Open

## The epidemiological profile of hysterectomy in rural Chinese women: a population-based study

|                               |                                                                                                                                                                                                                                                                                                                                                                                                                                                                                                                                                                                                                                                                                                                                                                                                                                                                                                                                                                                                                                                                                                                                                                                                                                                                                                                                                                                                                                                                                                                                                                                                                                                                                                                                                                                                                                                                                                                                                                                                                                                                                                                                                                                                                                                                                                                                                                                                                                                                                                                                                                                                                          |
|-------------------------------|--------------------------------------------------------------------------------------------------------------------------------------------------------------------------------------------------------------------------------------------------------------------------------------------------------------------------------------------------------------------------------------------------------------------------------------------------------------------------------------------------------------------------------------------------------------------------------------------------------------------------------------------------------------------------------------------------------------------------------------------------------------------------------------------------------------------------------------------------------------------------------------------------------------------------------------------------------------------------------------------------------------------------------------------------------------------------------------------------------------------------------------------------------------------------------------------------------------------------------------------------------------------------------------------------------------------------------------------------------------------------------------------------------------------------------------------------------------------------------------------------------------------------------------------------------------------------------------------------------------------------------------------------------------------------------------------------------------------------------------------------------------------------------------------------------------------------------------------------------------------------------------------------------------------------------------------------------------------------------------------------------------------------------------------------------------------------------------------------------------------------------------------------------------------------------------------------------------------------------------------------------------------------------------------------------------------------------------------------------------------------------------------------------------------------------------------------------------------------------------------------------------------------------------------------------------------------------------------------------------------------|
| Journal:                      | <i>BMJ Open</i>                                                                                                                                                                                                                                                                                                                                                                                                                                                                                                                                                                                                                                                                                                                                                                                                                                                                                                                                                                                                                                                                                                                                                                                                                                                                                                                                                                                                                                                                                                                                                                                                                                                                                                                                                                                                                                                                                                                                                                                                                                                                                                                                                                                                                                                                                                                                                                                                                                                                                                                                                                                                          |
| Manuscript ID                 | bmjopen-2016-015351.R2                                                                                                                                                                                                                                                                                                                                                                                                                                                                                                                                                                                                                                                                                                                                                                                                                                                                                                                                                                                                                                                                                                                                                                                                                                                                                                                                                                                                                                                                                                                                                                                                                                                                                                                                                                                                                                                                                                                                                                                                                                                                                                                                                                                                                                                                                                                                                                                                                                                                                                                                                                                                   |
| Article Type:                 | Research                                                                                                                                                                                                                                                                                                                                                                                                                                                                                                                                                                                                                                                                                                                                                                                                                                                                                                                                                                                                                                                                                                                                                                                                                                                                                                                                                                                                                                                                                                                                                                                                                                                                                                                                                                                                                                                                                                                                                                                                                                                                                                                                                                                                                                                                                                                                                                                                                                                                                                                                                                                                                 |
| Date Submitted by the Author: | 10-Apr-2017                                                                                                                                                                                                                                                                                                                                                                                                                                                                                                                                                                                                                                                                                                                                                                                                                                                                                                                                                                                                                                                                                                                                                                                                                                                                                                                                                                                                                                                                                                                                                                                                                                                                                                                                                                                                                                                                                                                                                                                                                                                                                                                                                                                                                                                                                                                                                                                                                                                                                                                                                                                                              |
| Complete List of Authors:     | <p>Liu, Fangfang; Peking University Cancer Hospital &amp; Institute, Key Laboratory of Carcinogenesis and Translational Research (Ministry of Education/Beijing), Laboratory of Genetics</p> <p>Pan, Yaqi; Peking University Cancer Hospital &amp; Institute, Key Laboratory of Carcinogenesis and Translational Research (Ministry of Education/Beijing), Laboratory of Genetics</p> <p>Liang, Yongmei; Peking University Cancer Hospital &amp; Institute, Key Laboratory of Carcinogenesis and Translational Research (Ministry of Education/Beijing), Laboratory of Genetics</p> <p>Zhang, Chaoting; Peking University Cancer Hospital &amp; Institute, Key Laboratory of Carcinogenesis and Translational Research (Ministry of Education/Beijing), Laboratory of Genetics</p> <p>Deng, Qiuju; Peking University Cancer Hospital &amp; Institute, Key Laboratory of Carcinogenesis and Translational Research (Ministry of Education/Beijing), Laboratory of Genetics</p> <p>Li, Xiang; Peking University Cancer Hospital &amp; Institute, Key Laboratory of Carcinogenesis and Translational Research (Ministry of Education/Beijing), Laboratory of Genetics</p> <p>Liu, Mengfei; Peking University Cancer Hospital &amp; Institute, Key Laboratory of Carcinogenesis and Translational Research (Ministry of Education/Beijing), Laboratory of Genetics</p> <p>He, Zhonghu; Peking University Cancer Hospital &amp; Institute, Key Laboratory of Carcinogenesis and Translational Research (Ministry of Education/Beijing), Laboratory of Genetics</p> <p>Liu, Ying; Peking University Cancer Hospital &amp; Institute, Key Laboratory of Carcinogenesis and Translational Research (Ministry of Education/Beijing), Laboratory of Genetics</p> <p>Li, Jingjing; Peking University Cancer Hospital &amp; Institute, Key Laboratory of Carcinogenesis and Translational Research (Ministry of Education/Beijing), Laboratory of Genetics</p> <p>Ning, Tao; Peking University Cancer Hospital &amp; Institute, Key Laboratory of Carcinogenesis and Translational Research (Ministry of Education/Beijing), Laboratory of Genetics</p> <p>Guo, Chuanhai; Peking University Cancer Hospital &amp; Institute, Key Laboratory of Carcinogenesis and Translational Research (Ministry of Education/Beijing), Laboratory of Genetics</p> <p>Xu, Ruiping; Anyang Cancer Hospital</p> <p>Zhang, Lixin; Anyang Cancer Hospital</p> <p>Cai, Hong; Peking University Cancer Hospital &amp; Institute, Key Laboratory of Carcinogenesis and Translational Research (Ministry of Education/Beijing), Laboratory of Genetics</p> |

1  
2  
3  
4  
5  
6  
7  
8  
9  
10  
11  
12  
13  
14  
15  
16  
17  
18  
19  
20  
21  
22  
23  
24  
25  
26  
27  
28  
29  
30  
31  
32  
33  
34  
35  
36  
37  
38  
39  
40  
41  
42  
43  
44  
45  
46  
47  
48  
49  
50  
51  
52  
53  
54  
55  
56  
57  
58  
59  
60

|                                 |                                                                                                                                                                              |
|---------------------------------|------------------------------------------------------------------------------------------------------------------------------------------------------------------------------|
|                                 | Ke, Yang; Peking University Cancer Hospital & Institute, Key Laboratory of Carcinogenesis and Translational Research (Ministry of Education/Beijing), Laboratory of Genetics |
| <b>Primary Subject Heading</b>: | Epidemiology                                                                                                                                                                 |
| Secondary Subject Heading:      | Obstetrics and gynaecology                                                                                                                                                   |
| Keywords:                       | GYNAECOLOGY, Hysterectomy, Prevalence, EPIDEMIOLOGY                                                                                                                          |
|                                 |                                                                                                                                                                              |

SCHOLARONE™  
Manuscripts

For peer review only

## TITLE PAGE

## TITLE

The epidemiological profile of hysterectomy in rural Chinese women: a population-based study

## RUNNING TITLE

Hysterectomy in rural China

## AUTHORS AND AFFILIATIONS:

Fangfang Liu<sup>a†</sup>, Yaqi Pan<sup>a†</sup>, Yongmei Liang<sup>a</sup>, Chaoting Zhang<sup>a</sup>, Qiuju Deng<sup>a</sup>, Xiang Li<sup>a</sup>,  
Mengfei Liu<sup>a</sup>, Zhonghu He<sup>a</sup>, Ying Liu<sup>a</sup>, Jingjing Li<sup>a</sup>, Tao Ning<sup>a</sup>, Chuanhai Guo<sup>a</sup>, Ruiping Xu<sup>b</sup>,  
Lixin Zhang<sup>b</sup>, Hong Cai<sup>a</sup> and Yang Ke<sup>a\*</sup>

a Key Laboratory of Carcinogenesis and Translational Research (Ministry of Education/Beijing), Laboratory of Genetics, Peking University Cancer Hospital & Institute, No. 52 Fucheng Road, Haidian District, Beijing 100142, China

b Anyang Cancer Hospital, No. 1 Binhebei Rd, Anyang, Henan Province 455000, China

† These authors contributed equally to this paper.

**CORRESPONDING AUTHOR:****Yang Ke:**

Key Laboratory of Carcinogenesis and Translational Research (Ministry of Education/Beijing), Laboratory of Genetics, Peking University Cancer Hospital & Institute, No. 52 Fucheng Road, Haidian District, Beijing 100142, China.

Phone: 86-10-88196762; Fax: 86-10-88196735;

E-mail: [keyang@bjmu.edu.cn](mailto:keyang@bjmu.edu.cn)

**Word Count:** 2,646 words.

**Number of tables:** 2 tables.

**Number of figures:** 1 figure.

**Number of supplementary materials:** 1 supplementary table and 1 supplementary figure.

**Number of references:** 50 references.



**ABSTRACT**

**Objectives.** Hysterectomy is one of the most common surgical procedures performed on women in developed countries, however, little is known about the epidemiology of hysterectomy in developing regions. This study seeks to evaluate the prevalence of hysterectomy and its risk factors in rural China.

**Methods.** Questionnaires were collected from 3328 female adults aged 25-69 years in rural Anyang, China in 2009-2011. Hysterectomy status was ascertained by the gynecologist at the time of cytological test. Univariate and multivariate regression analyses were performed to assess the risk factors for hysterectomy.

**Results.** The overall prevalence of hysterectomy was 3.31% (110/3,328). Women above the age of 40 years had a higher prevalence of prior hysterectomy, compared to those aged 25-39 years (5.01% vs. 0.33%). Obesity was marginally related with a higher risk of hysterectomy (Adjusted OR=1.59; 95% CI, 0.99-2.56; body mass index (BMI)  $\geq 28.0$  vs.  $18.5 \leq \text{BMI} < 24.0$ ). History of prior pregnancy loss conferred a greater risk for hysterectomy (Adjusted OR=1.51; 95% CI, 1.02-2.23). Of the 75 (68.18%, 75/110) cases who provided further information on hysterectomy, 84.00% (63/75) had undergone total abdominal hysterectomy, and 70.67% (53/75) had received surgery for leiomyoma.

**Conclusions.** Rural Chinese women had a relatively low prevalence of hysterectomy, and the majority of reported hysterectomies were performed abdominally for leiomyoma. Hysterectomy prevalence differed significantly by age, body mass index, and history of pregnancy loss. This study expands the current understanding of the epidemiology of

1  
2  
3  
4 hysterectomy in lower-resource areas.  
5  
6

7 **Keywords** Hysterectomy; prevalence; risk factors; indications; surgical types  
8  
9

10 **Strengths and limitations of this study**  
11

12  
13 1. This is the first study to demonstrate the prevalence of and factors associated with  
14 hysterectomy in a general population in rural China; one of the main strengths is, therefore,  
15 the population-based nature and low-resource setting of this study.  
16  
17

18  
19  
20  
21 2. The use of hysterectomy status data ascertained by a gynecologist in a cervical cytology  
22 screening program in rural China, where no regional or national databases were available,  
23 enabled us to estimate the prevalence and risk factors of hysterectomy in this area.  
24  
25  
26

27  
28  
29 3. The possibility of a response bias of participants may reduce the generalizability of our  
30 findings to a wider population.  
31  
32

33  
34  
35 4. The small number of hysterectomy cases may have affected the precision of our assessment  
36 of the predictors of hysterectomy.  
37  
38  
39  
40  
41  
42  
43  
44  
45  
46  
47  
48  
49  
50  
51  
52  
53  
54  
55  
56  
57  
58  
59  
60

## INTRODUCTION

Hysterectomy is one of the most frequent surgical procedures performed on women in developed countries.<sup>1</sup> The epidemiology of hysterectomy in the female general population is of public health importance because this procedure may affect the population at risk for uterine diseases<sup>2</sup> and it may also be associated with significant socioeconomic and personal consequences when widely performed. Previous studies, mainly undertaken in developed regions, have shown that the prevalence of hysterectomy varies substantially by race and geographic area (4%-40%).<sup>3-7</sup> Education level, age at first birth, parity, number of miscarriages, and other potential risk factors have been inconsistently associated with the risk of hysterectomy.<sup>5, 8-10</sup> The indications for and surgical techniques used for hysterectomy have also been found to differ across regions<sup>1, 4, 11-13</sup>; however, in general, the major indication for hysterectomy is leiomyoma, and the dominant surgical type is abdominal hysterectomy.<sup>1, 14</sup>

Till now, the epidemiology of hysterectomy in developing countries, including China, remains largely unknown. This population-based cross-sectional study, among 3,328 rural Chinese women, seeks to: 1) assess the prevalence and risk factors of hysterectomy; and 2) investigate indications for and types of hysterectomy among identified cases.

## METHODS

### Study population

This population-based survey was part of an ongoing esophageal cancer cohort study in rural Anyang, China.<sup>14</sup> Anyang is an agricultural region of low-income with a per capita gross

1  
2  
3  
4 domestic product (GDP) of US\$3,672 (2010). Like in other rural areas of China, the New  
5  
6 Rural Cooperative Medical Scheme (NRCMS, a government-run voluntary insurance  
7  
8 programme), initiated in 2003, is a major health insurance programme in rural Anyang. In  
9  
10 2013, the per capita premium was \$57.8, and NRCMS accounted for 99% of all rural  
11  
12 residents in China.<sup>15</sup> The current investigation utilized a subset including 6 of the 9 target  
13  
14 villages which were cluster-sampled in the parent cohort study conducted from 2009 to 2011.  
15  
16 Eligibility criteria for subjects enrolled in this study were as follows: 1) female permanent  
17  
18 residency in the target villages (registered in the China's unique household registration  
19  
20 (Hukou) system); 2) aged 25-69 years; 3) no prior diagnosis of cancer (9 residents were  
21  
22 excluded before enrollment because of self-reported history of cancer including 1 with  
23  
24 cervical cancer), mental disorder, or cardiovascular disease; and 4) no past history of HBV,  
25  
26 HCV, or HIV infection. All participants in this study provided written informed consent. This  
27  
28 study was approved by the Institutional Review Board of the Peking University School of  
29  
30 Oncology, China. The methods were carried out in accordance with the approved guidelines.  
31  
32  
33  
34  
35  
36  
37  
38

### 39 **Measurements**

40  
41 Briefly, hysterectomy status was ascertained by a gynecologist at the time of gynecologic  
42  
43 examination and cytological test. Data on sociodemographic factors, cigarette smoking  
44  
45 (defined as at least one cigarette or more per day for at least one year), alcohol consumption  
46  
47 (defined as the consumption of Chinese liquor two or more times per week for at least one  
48  
49 year), reproductive history, and personal health habits (e.g., genital washing before sexual  
50  
51 intercourse) were collected through face-to-face interviews before gynecologic tests on the  
52  
53 same day. Height and weight were measured by the interviewers.  
54  
55  
56  
57  
58  
59  
60

1  
2  
3  
4 For cases reporting a hysterectomy, the time of the procedure along with the information on  
5  
6 the indications for and surgical techniques used to perform hysterectomy were also recorded.  
7

8  
9 In this study, the modes of hysterectomy were divided into six categories, including total  
10  
11 abdominal hysterectomy (involving removal of the uterus and its attached cervix through an  
12  
13 incision in the lower abdomen), subtotal abdominal hysterectomy (involving removal of only  
14  
15 the uterine body, leaving the cervix intact, through an incision in the lower abdomen), vaginal  
16  
17 hysterectomy (involving removal of the uterus via the vagina, without an abdominal incision),  
18  
19 laparoscopic hysterectomy (involving the use of laparoscopy to perform hysterectomy),  
20  
21 radical hysterectomy (involving removal of the uterus and resection of the ventral or lateral  
22  
23 parametria), and other unspecified hysterectomy.  
24  
25  
26  
27

### 28 29 **Statistical analysis**

30  
31  
32 Prevalence estimates along with 95% confidence intervals (CI) were estimated using a null  
33  
34 linear regression model implemented with the Generalized Estimating Equation (GEE) with a  
35  
36 robust sandwich estimator of covariance to adjust for intracluster correlation.<sup>16</sup> The China  
37  
38 2010 Population Census data and the World Health Organization world standard population  
39  
40 data were used for calculating the adjusted prevalence of prior hysterectomy.<sup>17</sup> Potential risk  
41  
42 factors that were statistically significant in univariate GEE regression analyses were entered  
43  
44 in the final multivariate GEE regression models. Significant differences between groups were  
45  
46 quantified by calculating adjusted odds ratios (OR) and 95% confidence intervals (CI). Tests  
47  
48 for linear trends were performed by treating ordered categorical variables as continuous  
49  
50 variables in the GEE regression analyses. Linear regression models were used to determine  
51  
52 whether any variables in the multivariate models were highly collinear. In this study, all  
53  
54  
55  
56  
57  
58  
59  
60

1  
2  
3  
4 variance inflation factors were below 3.0 and therefore within the acceptable range.  
5

6  
7 Statistical analyses were performed using STATA version 12.0 (STATA Corporation, College  
8  
9 Station, TX, USA). All statistical tests were two-sided at the 0.05 significance level.  
10  
11

## 12 13 14 15 **RESULTS**

### 16 17 18 **Participant characteristics**

19  
20  
21 Of 3,849 eligible candidates, 3,328 (86.5%) were enrolled in the study (the other 521  
22  
23 candidates, who were more frequently of younger age, did not participate, mainly because  
24  
25 they were employed outside of Anyang). The median age of these 3,328 participants was 43  
26  
27 years. Most subjects were married or cohabiting (95.00%); of the participants, 92.85% had a  
28  
29 level of education of less than 9 years, and 88.52% were engaged in farming (Supplementary  
30  
31 Table S1). Both cigarette smoking (0.27%) and alcohol consumption (0.21%) were  
32  
33 uncommon. Approximately one half of the women were overweight (31.40%) or obese  
34  
35 (18.66%), 43.27% reported menarche at the age of  $\leq 15$  years, 39.84% had their first birth at  
36  
37 the age of  $\leq 22$  years, 37.71% had a parity  $> 2$ , 43.66% reported having a history of fetal loss,  
38  
39 77.34% used an intrauterine contraceptive device, 37.89% reported having had a tubal  
40  
41 ligation, and 8.80% had a history of post-intercourse bleeding.  
42  
43  
44  
45  
46  
47  
48

### 49 50 **Prevalence and risk factors for hysterectomy**

51  
52  
53 The overall prevalence of prior hysterectomy was 3.31% (110/3328, 95% CI: 2.49-4.12).  
54  
55 Adjusted estimates of prevalence standardized by the age structure of the female population  
56  
57  
58  
59  
60

1  
2  
3  
4 of China's 2010 Census and by the age distribution of the World Health Organization world  
5  
6 standard population of 2001 were 3.21% and 3.03% respectively. Figure 1 shows the  
7  
8 prevalence of prior hysterectomy according to five-year age groups. Among women age  
9  
10 25-39, 0.33% (4/1214) had no uterus (age 25-29: 0.32%; age 30-34: 0.52%; age 35-39: 0.19%).  
11  
12 The percentage rose to 7.22% (27/374) among women age 45-49. After age 50, the prevalence  
13  
14 of prior hysterectomy declined somewhat (Figure 1). Women above the age of 40 years had a  
15  
16 higher prevalence of prior hysterectomy compared to those aged 25-39 years (5.01 % vs.  
17  
18 0.33%, data not shown). Obesity was marginally related with a higher risk of hysterectomy  
19  
20 (Adjusted OR=1.59; 95% CI, 0.99-2.56; body mass index (BMI)  $\geq 28.0$  vs.  $18.5 \leq \text{BMI} <$   
21  
22 24.0) (Table 1). History of prior pregnancy loss conferred a greater risk for hysterectomy  
23  
24 (Adjusted OR=1.51; 95% CI, 1.02-2.23) (Table 1).  
25  
26  
27  
28  
29  
30  
31

### 32 **Indications and surgical types for hysterectomy**

33  
34  
35 A total of 75 (68.18%, 75/110) cases provided further information on hysterectomy, with  
36  
37 mean age at time of hysterectomy of 44 years (standard deviation: 7.6 years; range: 27-66  
38  
39 years) (Supplementary Figure S1). Of these 75 cases, 70.67% (53/75) had a hysterectomy  
40  
41 performed for leiomyoma, 10.67% (8/75) had a hysterectomy performed for dysfunctional  
42  
43 uterine bleeding, 1.33% (1/75) had a hysterectomy performed for cervical cancer, and 6.67%  
44  
45 (5/75) had a hysterectomy performed for other indications (Table 2). Total abdominal  
46  
47 hysterectomy was the most common surgical technique (84.00%, 63/75), while other methods  
48  
49 such as vaginal hysterectomy (2.67%, 2/75) and laparoscopic hysterectomy (1.33%, 1/75)  
50  
51 each accounted for  $\leq 3\%$  of the total hysterectomies.  
52  
53  
54  
55  
56  
57  
58  
59  
60

## DISCUSSION

To our knowledge, this is the first study to demonstrate the prevalence of and factors associated with hysterectomy in a general population in rural China. Data from this study demonstrated that rural Chinese women had a low prevalence of hysterectomy. Obesity and history of prior pregnancy loss were associated with greater odds of hysterectomy. The most common indication for hysterectomy was leiomyoma, and the predominant procedure performed was abdominal hysterectomy. This investigation expands our knowledge about the epidemiological profile of hysterectomy in a low-income setting.

The overall prevalence of hysterectomy (3.3%) in our study was considerably lower than previous findings from studies conducted in developed countries such as the United States (26.2%), Ireland (22.2%), and Australia (22.0%)<sup>18-21</sup>, but closer to that identified in Taiwan (8.8%) and Singapore (7.5%).<sup>22, 23</sup> Data on hysterectomy is limited in developing settings. Our estimated prevalence was in the lower range reported by community-based studies from low- and middle-income countries such as India, El Salvador and Jordan (1.7%-9.8%)<sup>3, 24-31</sup>, similar to percentage reported among women textile workers in Shanghai, China (3.9%).<sup>32</sup> The low hysterectomy prevalence in this study population may be due to various reasons including limited availability of gynecology services, poor access to public/private sectors, and fear of surgical operations. Additionally, low affordability of medical care can be another explanation for the low prevalence. Based on data of China's National Health Survey in 2003, more than one-third of those who did not seek medical care while sick and over two-thirds of those who



1  
2  
3  
4 refused hospitalization after professional referral reported 'excessive cost' as the major factor  
5  
6 influencing their decisions.<sup>33</sup> The cultural norms associated with fertility-preserving treatment  
7  
8 may also have contributed to the relatively lower prevalence of hysterectomy.<sup>7,34</sup> The uterus,  
9  
10 as the childbearing organ, is seen as the essence of womanhood in China. Some individuals  
11  
12 may feel that they are no longer women after hysterectomy. Indeed, one previous study  
13  
14 showed that Chinese-American women who were educated in China and presumably less  
15  
16 acculturated into the American "hysterectomy-prone" culture had a low hysterectomy rate.<sup>35</sup>  
17  
18 Although the overall prevalence of hysterectomy was generally lower than the previously  
19  
20 reported rates in high-resource regions, the pattern of the age distribution of prior  
21  
22 hysterectomy prevalence was consistently similar.<sup>4</sup> The percentage of prior hysterectomy  
23  
24 started to increase in women aged 40-49 years and thereafter remained relatively stable,  
25  
26 which could be due to the sharp increase in hysterectomy incidence rates in this age group.<sup>4,36</sup>  
27  
28 In support of this reasoning, we observed that the average age at hysterectomy was 44 years  
29  
30 and more than one-half of all hysterectomies were done in women age 40-49 in this study.  
31  
32 According to previous investigations, this increase may be driven by the high occurrence of  
33  
34 uterine leiomyoma, the main indication for surgically removing the uterus, among women  
35  
36 aged 40-49 years.<sup>36</sup> Approximately one quarter of hysterectomies were performed in women  
37  
38 younger than 40 years of age in this study. Evidence on the long-term side effects of  
39  
40 hysterectomy suggests that hysterectomies, especially those performed at young age, are  
41  
42 associated with earlier onset of menopause and higher risk of cardiovascular disease, urinary  
43  
44 incontinence and problems with sexual function.<sup>37-40</sup> Research is required across China to  
45  
46 monitor trends and track long-term health effects of hysterectomy.  
47  
48  
49  
50  
51  
52  
53  
54  
55  
56  
57  
58  
59  
60

1  
2  
3  
4 For indications and surgical types for hysterectomy, similar to reports from Taiwan<sup>6</sup> and  
5  
6 Western countries,<sup>36,41</sup> leiomyoma of the uterus predominated among the medical conditions  
7  
8 leading to hysterectomy in this study population; among women undergoing hysterectomy,  
9  
10 abdominal hysterectomy was the most frequently performed procedure, also in agreement  
11  
12 with most previous studies.<sup>1, 4</sup> However, the frequencies at which different types of  
13  
14 hysterectomies were performed have been found to vary markedly across populations and  
15  
16 over time, probably due to differences in healthcare resources, surgeon experience, and  
17  
18 patient attitudes.<sup>4, 18, 42</sup> According to a Cochrane review of studies mainly conducted in  
19  
20 Western countries, vaginal hysterectomy, which has become more widely performed,  
21  
22 appeared to be superior to laparoscopic and abdominal hysterectomy for benign diseases, as it  
23  
24 has been associated with a speedier return to normal activities due to smaller incisions.<sup>42</sup>  
25  
26 However, there is limited evidence about the changes in hysterectomy rates over time and the  
27  
28 relative superiority of hysterectomy approaches for addressing benign conditions in  
29  
30 low-resource settings, and further research in this regard is needed.  
31  
32  
33  
34  
35  
36  
37  
38

39  
40 In terms of predictors for hysterectomy, it should be noted that data on sociodemographic  
41  
42 factors and behavioral characteristics as well as information about BMI status were only  
43  
44 gathered at the time of interview, hence whether there was any change in these questionnaire  
45  
46 data before or after a hysterectomy, if performed, is unknown. The following discussion was  
47  
48 based on the assumption that the information of aforementioned variables remained  
49  
50 unchanged before the interview. In this study, prior pregnancy loss was associated with  
51  
52 greater odds of hysterectomy; this finding is consistent with previous reports.<sup>5,9,41</sup> Induced  
53  
54 abortions have been commonly used in China since the 1970s as part of the national family  
55  
56  
57  
58  
59  
60

1  
2  
3  
4 planning programme. According to surveys conducted in China, approximately 50% of  
5  
6 women had prior abortions, primarily aiming to limit family size.<sup>43,44</sup> Complications such as  
7  
8 uterine perforation resulting from surgical abortion may lead to the application of  
9  
10 hysterectomy as a treatment option.<sup>45</sup> In addition to being a risk factor, pregnancy loss may  
11  
12 also be a reflection of uterine dysfunction that leads to an indication for hysterectomy. More  
13  
14 qualitative research is needed regarding the biological and attitudinal links between prior fetal  
15  
16 loss and hysterectomy, from both women's and physicians' perspectives. In terms of schooling,  
17  
18 lower education level has been associated with a higher risk of hysterectomy; however, this  
19  
20 association seems to vary by geographic location.<sup>2, 12, 41, 46, 47</sup> In this study, no correlation was  
21  
22 found between education level and hysterectomy. Whether this null risk estimate was a true  
23  
24 lack of association or merely due to insufficient statistical power because of the small number  
25  
26 of hysterectomy cases and low proportion of women with high education levels included in  
27  
28 our analysis is unclear. Concerning BMI, a higher hysterectomy frequency was observed in  
29  
30 obese women in this study, confirming findings from other studies.<sup>48</sup> The correlation between  
31  
32 obesity and hysterectomy can be partially explained by the fact that obesity elevates the risk  
33  
34 of many gynecological conditions that may result in hysterectomy.<sup>49</sup> For instance, obesity has  
35  
36 been reported to be associated with pelvic organ prolapse and uterine fibroids, which are  
37  
38 common indications for hysterectomy.<sup>50</sup> Obese women are also more likely to develop  
39  
40 endometrial carcinomas and pelvic inflammatory diseases, which are less common indications  
41  
42 for hysterectomy.<sup>49</sup> Again, however, whether BMI status varied with undergoing hysterectomy  
43  
44 is not determinable from the data at hand. Further studies with larger sample sizes are  
45  
46 warranted to validate the factors affecting hysterectomy.  
47  
48  
49  
50  
51  
52  
53  
54  
55  
56  
57  
58  
59  
60

1  
2  
3  
4 This study has some strengths and limitations. As regional or national databases in rural China  
5  
6 are not as readily available as they are in developed countries, the use of hysterectomy status  
7  
8 data ascertained by a gynecologist in a cervical cytology screening program among rural  
9  
10 Chinese women enabled us to evaluate the prevalence and predictors of hysterectomy in this  
11  
12 area. Thus, one of the main strengths of this study is the population-based nature and  
13  
14 low-resource setting. The limitations of this study are as follows. First, the possibility of a  
15  
16 selection bias (e.g. bias introduced by exclusion of individuals with a prior history of cervical  
17  
18 cancer) may reduce the generalizability of our findings to a wider population. Second, due to  
19  
20 the response bias of participants, there is no assurance that the epidemiological profile of  
21  
22 hysterectomy observed here would hold true for the region as a whole. Third, self-reported  
23  
24 maternal and reproductive characteristics may be subject to recall bias. Additionally, the small  
25  
26 number of hysterectomy cases may have affected the precision of our assessment of the  
27  
28 predictors of hysterectomy. Finally, due to the cross-sectional nature of this study, a temporal  
29  
30 relationship cannot be inferred. Despite these limitations, our study still provides baseline  
31  
32 information on the prevalence and predictors of hysterectomy, as well as indications for and  
33  
34 procedures used in hysterectomies in rural China.  
35  
36  
37  
38  
39  
40  
41  
42  
43

44  
45 In summary, rural Chinese women had a relatively low prevalence of hysterectomy, which  
46  
47 were largely performed abdominally for leiomyoma. Older age, obesity and history of prior  
48  
49 fetal loss were associated with increased risk of hysterectomy among this study population.  
50  
51 These findings provide insights into the hysterectomy epidemiology in lower-resource areas.  
52  
53  
54 Further studies are needed to monitor the trend of incidence rate of hysterectomy and modes  
55  
56 of surgery over time.  
57  
58  
59  
60

## CONTRIBUTORS

YK and HC were involved in the design and conducting of the survey. YP, YL, FL, QD, XL, ML, ZH, YL, JL, TN, CG, RX and LZ were involved in conducting the field work. FL and CZ performed the statistical analyses and wrote the manuscript text. All authors reviewed the manuscript.

## ETHICAL APPROVAL AND INFORMED CONSENT

The study was approved by the Institutional Review Board of the School of Oncology, Peking University (Approval number: 2006020). All participants provided written informed consent. The methods were carried out in accordance with the approved guidelines.

## FUNDING

This work was supported by the Beijing Municipal Science and Technology Commission [grant number Z141100002114046]; the Charity Project of National Ministry of Health [grant number 201202014]; the "863" Key Projects of National Ministry of Science and Technology Grant [grant numbers 2012AA02A209 and 2012AA022502]; and the Natural Science Foundation of China [grant number 81502855].

## DATA SHARING

1  
2  
3  
4 No additional data available.  
5  
6  
7  
8

9  
10 **CONFLICT OF INTEREST**

11  
12 The authors declare they have no conflict of interest with respect to this research study and  
13 paper.  
14  
15  
16  
17  
18  
19

20  
21 **ACKNOWLEDGEMENTS**

22  
23  
24 We thank Dr. Robert S. Burk for editing and correction of this manuscript.  
25  
26  
27  
28  
29  
30  
31  
32  
33  
34  
35  
36  
37  
38  
39  
40  
41  
42  
43  
44  
45  
46  
47  
48  
49  
50  
51  
52  
53  
54  
55  
56  
57  
58  
59  
60

## REFERENCES

1. Garry R. The future of hysterectomy. *BJOG : an international journal of obstetrics and gynaecology*. 2005 Feb;112(2):133-9.
2. Koepsell TD, Weiss NS, Thompson DJ, Martin DP. Prevalence of prior hysterectomy in the Seattle-Tacoma area. *Am J Public Health*. 1980 Jan;70(1):40-7.
3. Barghouti FF, Yasein NA, Jaber RM, Hatamleh LN, Takruri AH. Prevalence and risk factors of urinary incontinence among Jordanian women: impact on their life. *Health Care Women Int*. 2013;34(11):1015-23.
4. Merrill RM. Hysterectomy surveillance in the United States, 1997 through 2005. *Medical science monitor : international medical journal of experimental and clinical research*. 2008 Jan;14(1):CR24-31.
5. Dharmalingam A, Pool I, Dickson J. Biosocial determinants of hysterectomy in New Zealand. *Am J Public Health*. 2000 Sep;90(9):1455-8.
6. Chang C, Mao CL, Hu YH. Prevalence of hysterectomy of Chinese women in Taiwan. *Int J Gynaecol Obstet*. 1996 Jan;52(1):73-4.
7. Stang A, Merrill RM, Kuss O. Hysterectomy in Germany: a DRG-based nationwide analysis, 2005-2006. *Deutsches Arzteblatt international*. 2011 Jul;108(30):508-14.
8. Stang A, Kluttig A, Moebus S, Volzke H, Berger K, Greiser KH, et al. Educational level, prevalence of hysterectomy, and age at amenorrhoea: a cross-sectional analysis of 9536 women from six population-based cohort studies in Germany. *BMC women's health*. 2014;14:10.
9. Zhang Y, Lee ET, Cowan LD, North KE, Wild RA, Howard BV. Hysterectomy prevalence and cardiovascular disease risk factors in American Indian women. *Maturitas*. 2005 Nov-Dec;52(3-4):328-36.
10. Desai S, Campbell OM, Sinha T, Mahal A, Cousens S. Incidence and determinants of hysterectomy in a low-income setting in Gujarat, India. *Health policy and planning*. 2016 Aug 6.
11. Weaver F, Hynes D, Goldberg JM, Khuri S, Daley J, Henderson W. Hysterectomy in Veterans Affairs Medical Centers. *Obstet Gynecol*. 2001 Jun;97(6):880-4.
12. Byles JE, Mishra G, Schofield M. Factors associated with hysterectomy among women in Australia. *Health & place*. 2000 Dec;6(4):301-8.
13. DeCherney AH, Bachmann G, Isaacson K, Gall S. Postoperative fatigue negatively impacts the daily lives of patients recovering from hysterectomy. *Obstet Gynecol*. 2002 Jan;99(1):51-7.
14. Liu F, Guo F, Zhou Y, He Z, Tian X, Guo C, et al. The Anyang Esophageal Cancer Cohort Study: study design, implementation of fieldwork, and use of computer-aided survey system. *PLoS One*. 2012;7(2):e31602.
15. Chinese Ministry of Health and Family Planning. NCMS Progress in 2012 and Key Work in 2013 Chinese Ministry of Health and Family Planning: [http://www.nhfp.gov.cn/jws/hzyl/list\\_3.shtml](http://www.nhfp.gov.cn/jws/hzyl/list_3.shtml). 2013.
16. Zeger SL, Liang KY. Longitudinal data analysis for discrete and continuous outcomes. *Biometrics*. 1986 Mar;42(1):121-30.
17. Ahmad OB, Boschi-Pinto C, Lopez AD, Murray CJ, Lozano R, Inoue M. GPE discussion paper series: No. 31: Age standardization of rates: a new WHO standard. World Health Organization. 2001.
18. Spilisbury K, Semmens JB, Hammond I, Bolck A. Persistent high rates of hysterectomy in Western Australia: a population-based study of 83 000 procedures over 23 years. *BJOG : an international journal of obstetrics and gynaecology*. 2006 Jul;113(7):804-9.

19. Wilcox LS, Koonin LM, Pokras R, Strauss LT, Xia Z, Peterson HB. Hysterectomy in the United States, 1988-1990. *Obstet Gynecol.* 1994 Apr;83(4):549-55.
20. McPherson K, Strong PM, Epstein A, Jones L. Regional variations in the use of common surgical procedures: within and between England and Wales, Canada and the United States of America. *Social science & medicine Part A, Medical sociology.* 1981 May;15(3 Pt 1):273-88.
21. van Keep PA, Wildemeersch D, Lehert P. Hysterectomy in six European countries. *Maturitas.* 1983 Aug;5(2):69-75.
22. Hsieh CH, Lee MS, Lee MC, Kuo TC, Hsu CS, Chang ST. Risk factors for urinary incontinence in Taiwanese women aged 20-59 years. *Taiwan J Obstet Gynecol.* 2008 Jun;47(2):197-202.
23. Lam JS, Tay WT, Aung T, Saw SM, Wong TY. Female reproductive factors and major eye diseases in Asian women -the Singapore Malay Eye Study. *Ophthalmic epidemiology.* 2014 Apr;21(2):92-8.
24. Kaur S, Walia I, Singh A. How menopause affects the lives of women in suburban Chandigarh, India. *Climacteric : the journal of the International Menopause Society.* 2004 Jun;7(2):175-80.
25. Shakhathreh FM. Epidemiology of urinary incontinence in Jordanian women. *Saudi Med J.* 2005 May;26(5):830-5.
26. Patel V, Tanksale V, Sahasrabhojane M, Gupte S, Nevrekar P. The burden and determinants of dysmenorrhoea: a population-based survey of 2262 women in Goa, India. *BJOG : an international journal of obstetrics and gynaecology.* 2006 Apr;113(4):453-63.
27. Ozel B, Borchelt AM, Cimino FM, Cremer M. Prevalence and risk factors for pelvic floor symptoms in women in rural El Salvador. *Int Urogynecol J Pelvic Floor Dysfunct.* 2007 Sep;18(9):1065-9.
28. Singh A, Arora AK. Why Hysterectomy Rate are Lower in India. *Indian journal of community medicine : official publication of Indian Association of Preventive & Social Medicine.* 2008 Jul;33(3):196-7.
29. Bhasin SK, Roy R, Agrawal S, Sharma R. An epidemiological study of major surgical procedures in an urban population of East delhi. *The Indian journal of surgery.* 2011 Apr;73(2):131-5.
30. Desai S, Sinha T, Mahal A. Prevalence of hysterectomy among rural and urban women with and without health insurance in Gujarat, India. *Reproductive health matters.* 2011 May;19(37):42-51.
31. Sarna A, Friedland BA, Srikrishnan AK, Katzen LL, Tun W, Abbott SA, et al. Sexually transmitted infections and reproductive health morbidity in a cohort of female sex workers screened for a microbicide feasibility study in Nellore, India. *Global journal of health science.* 2013 Feb 24;5(3):139-49.
32. Wong EY, Ray R, Gao DL, Wernli KJ, Li W, Fitzgibbons ED, et al. Reproductive history, occupational exposures, and thyroid cancer risk among women textile workers in Shanghai, China. *Int Arch Occup Environ Health.* 2006 Mar;79(3):251-8.
33. Liu D, Tsegai D. The New Cooperative Medical Scheme (NCMS) and its implications for access to health care and medical expenditure: Evidence from rural China. *ZEF- Discussion Papers on Development Policy No 155, Center for Development Research, Bonn.* 2011.
34. Broder MS, Kanouse DE, Mittman BS, Bernstein SJ. The appropriateness of recommendations for hysterectomy. *Obstet Gynecol.* 2000 Feb;95(2):199-205.
35. Powell LH, Meyer P, Weiss G, Matthews KA, Santoro N, Randolph JF, Jr., et al. Ethnic differences in past hysterectomy for benign conditions. *Womens Health Issues.* 2005 Jul-Aug;15(4):179-86.
36. Jacobson GF, Shaber RE, Armstrong MA, Hung YY. Hysterectomy rates for benign indications. *Obstet Gynecol.* 2006 Jun;107(6):1278-83.
37. Hunter MS, Gentry-Maharaj A, Ryan A, Burnell M, Lanceley A, Fraser L, et al. Prevalence,



1  
2  
3 frequency and problem rating of hot flushes persist in older postmenopausal women: impact of age,  
4 body mass index, hysterectomy, hormone therapy use, lifestyle and mood in a cross-sectional cohort  
5 study of 10,418 British women aged 54-65. *BJOG : an international journal of obstetrics and*  
6 *gynaecology*. 2012 Jan;119(1):40-50.

7  
8 38. Hoga LA, Higashi AB, Sato PM, Bozzini N, Baracat EC, Manganiello A. Psychosexual perspectives of  
9 the husbands of women treated with an elective hysterectomy. *Health Care Women Int*.  
10 2012;33(9):799-813.

11  
12 39. Farquhar CM, Sadler L, Harvey SA, Stewart AW. The association of hysterectomy and menopause:  
13 a prospective cohort study. *BJOG : an international journal of obstetrics and gynaecology*. 2005  
14 Jul;112(7):956-62.

15  
16 40. Yeh JS, Cheng HM, Hsu PF, Sung SH, Liu WL, Fang HL, et al. Hysterectomy in young women  
17 associates with higher risk of stroke: a nationwide cohort study. *Int J Cardiol*. 2013 Oct  
18 03;168(3):2616-21.

19  
20 41. Brett KM, Marsh JV, Madans JH. Epidemiology of hysterectomy in the United States: demographic  
21 and reproductive factors in a nationally representative sample. *Journal of women's health / the official*  
22 *publication of the Society for the Advancement of Women's Health Research*. 1997 Jun;6(3):309-16.

23  
24 42. Aarts JW, Nieboer TE, Johnson N, Tavender E, Garry R, Mol BW, et al. Surgical approach to  
25 hysterectomy for benign gynaecological disease. *Cochrane Database Syst Rev*. 2015;8:CD003677.

26  
27 43. Sanderson M, Shu XO, Jin F, Dai Q, Wen W, Hua Y, et al. Abortion history and breast cancer risk:  
28 results from the Shanghai Breast Cancer Study. *Int J Cancer*. 2001 Jun 15;92(6):899-905.

29  
30 44. Ye Z, Gao DL, Qin Q, Ray RM, Thomas DB. Breast cancer in relation to induced abortions in a  
31 cohort of Chinese women. *Br J Cancer*. 2002 Oct 21;87(9):977-81.

32  
33 45. Grimes DA, Flock ML, Schulz KF, Cates W, Jr. Hysterectomy as treatment for complications of legal  
34 abortion. *Obstet Gynecol*. 1984 Apr;63(4):457-62.

35  
36 46. Treloar SA, Do KA, O'Connor VM, O'Connor DT, Yeo MA, Martin NG. Predictors of hysterectomy:  
37 an Australian study. *Am J Obstet Gynecol*. 1999 Apr;180(4):945-54.

38  
39 47. Nagata C, Takatsuka N, Kawakami N, Shimizu H. Soy product intake and premenopausal  
40 hysterectomy in a follow-up study of Japanese women. *Eur J Clin Nutr*. 2001 Sep;55(9):773-7.

41  
42 48. Fitzgerald DM, Berecki-Gisolf J, Hockey RL, Dobson AJ. Hysterectomy and weight gain.  
43 *Menopause*. 2009 Mar-Apr;16(2):279-85.

44  
45 49. Goodman MT, Hankin JH, Wilkens LR, Lyu LC, McDuffie K, Liu LQ, et al. Diet, body size, physical  
46 activity, and the risk of endometrial cancer. *Cancer Res*. 1997 Nov 15;57(22):5077-85.

47  
48 50. Pandey S, Bhattacharya S. Impact of obesity on gynecology. *Womens Health (Lond)*. 2010  
49 Jan;6(1):107-17.

TABLES

Table 1. Prevalence of and risk factors for hysterectomy among women in rural Anyang, China, 2009-2011

| Variables                                          | Hysterectomy,<br>No. (%) | No hysterectomy,<br>No. (%) | Crude OR (95% CI)   | Adjusted OR (95% CI) <sup>a</sup> | P value <sup>a</sup> |
|----------------------------------------------------|--------------------------|-----------------------------|---------------------|-----------------------------------|----------------------|
| Total                                              | 110 (3.31)               | 3,218 (96.69)               |                     |                                   |                      |
| Age (years)                                        |                          |                             |                     |                                   |                      |
| 25-40                                              | 4 (3.64)                 | 892 (27.72)                 | 1.00                | 1.00                              |                      |
| 41-56                                              | 66 (60.00)               | 1,527 (47.45)               | 9.52 (3.53, 25.64)  | 7.82 (2.87, 21.31)                | <0.001               |
| 57-69                                              | 40 (36.36)               | 799 (24.83)                 | 11.04 (4.02, 30.31) | 10.10 (3.48, 29.32)               | <0.001               |
| <i>P</i> <sub>trend</sub> <sup>b</sup>             |                          |                             | <0.001              | <0.001                            |                      |
| Marital status                                     |                          |                             |                     |                                   |                      |
| Never married, divorced, separated or widowed      | 5 (4.63)                 | 177 (5.59)                  | 1.00                |                                   |                      |
| Married or cohabiting                              | 103 (95.37)              | 2,992 (94.41)               | 1.24 (0.50, 3.12)   |                                   |                      |
| Type of employment                                 |                          |                             |                     |                                   |                      |
| Farming                                            | 101 (93.52)              | 2,845 (89.78)               | 1.00                |                                   |                      |
| Non-farming                                        | 7 (6.48)                 | 324 (10.22)                 | 0.61 (0.28, 1.32)   |                                   |                      |
| Education level                                    |                          |                             |                     |                                   |                      |
| Illiteracy (<1 year) or primary school (1-6 years) | 72 (66.67)               | 1,814 (57.33)               | 1.00                |                                   |                      |
| Junior high school (7-9 years)                     | 31 (28.70)               | 1,173 (37.07)               | 0.67 (0.44, 1.03)   |                                   |                      |
| Senior high school or above (>9 years)             | 5 (4.63)                 | 177 (5.59)                  | 0.71 (0.28, 1.79)   |                                   |                      |
| <i>P</i> <sub>trend</sub> <sup>b</sup>             |                          |                             | 0.085               |                                   |                      |
| Household annual income, RMB                       |                          |                             |                     |                                   |                      |
| ≤10,000                                            | 23 (35.94)               | 511 (30.42)                 | 1.00                |                                   |                      |
| 10,001-29,999                                      | 17 (26.56)               | 534 (31.79)                 | 0.71 (0.37, 1.34)   |                                   |                      |
| ≥30,000                                            | 24 (37.50)               | 635 (37.80)                 | 0.86 (0.48, 1.54)   |                                   |                      |
| <i>P</i> <sub>trend</sub> <sup>b</sup>             |                          |                             | 0.643               |                                   |                      |
| Cigarette smoking                                  |                          |                             |                     |                                   |                      |
| Never                                              | 108 (100.00)             | 3,160 (99.72)               | 1.00                |                                   |                      |

|    |                                          |             |               |                    |                   |       |
|----|------------------------------------------|-------------|---------------|--------------------|-------------------|-------|
| 7  | Ever                                     | 0 (0.00)    | 9 (0.28)      | NE                 |                   |       |
| 8  | Alcohol consumption                      |             |               |                    |                   |       |
| 9  | Never                                    | 107 (99.07) | 3,163 (99.81) | 1.00               |                   |       |
| 10 | Ever                                     | 1 (0.93)    | 6 (0.19)      | 4.89 (0.58, 41.33) |                   |       |
| 11 | Body mass index (BMI), Kg/m <sup>2</sup> |             |               |                    |                   |       |
| 12 | Normal weight (18.5 ≤ BMI < 24.0)        | 40 (36.70)  | 1,358 (44.42) | 1.00               | 1.00              |       |
| 13 | Overweight (24.0 ≤ BMI < 28.0)           | 34 (31.19)  | 1,011 (33.07) | 1.15 (0.72, 1.84)  | 1.06 (0.66, 1.70) | 0.815 |
| 14 | Obese (BMI ≥ 28.0)                       | 34 (31.19)  | 587 (19.20)   | 2.01 (1.26, 3.22)  | 1.59 (0.99, 2.56) | 0.054 |
| 15 | Underweight (BMI < 18.5)                 | 1 (0.92)    | 101 (3.30)    | 0.35 (0.05, 2.51)  | 0.38 (0.05, 2.94) | 0.355 |
| 16 | <i>P</i> <sub>trend</sub> <sup>b</sup>   |             |               | 0.061              | 0.223             |       |
| 17 | Age (years) at menarche                  |             |               |                    |                   |       |
| 18 | ≤15                                      | 46 (42.99)  | 1,394 (44.45) | 1.00               |                   |       |
| 19 | 16-18                                    | 45 (42.06)  | 1,391 (44.36) | 0.98 (0.64, 1.49)  |                   |       |
| 20 | ≥19                                      | 16 (14.95)  | 351 (11.19)   | 1.38 (0.77, 2.46)  |                   |       |
| 21 | <i>P</i> <sub>trend</sub> <sup>b</sup>   |             |               | 0.437              |                   |       |
| 22 | Menstruation                             |             |               |                    |                   |       |
| 23 | Regular                                  | 73 (68.22)  | 2,223 (70.80) | 1.00               |                   |       |
| 24 | Irregular                                | 34 (31.78)  | 917 (29.20)   | 0.88 (0.58, 1.34)  |                   |       |
| 25 | Age (years) at first birth               |             |               |                    |                   |       |
| 26 | ≤22                                      | 53 (49.53)  | 1,273 (40.84) | 1.00               |                   |       |
| 27 | 23-24                                    | 31 (28.97)  | 1,102 (35.35) | 0.68 (0.43, 1.07)  |                   |       |
| 28 | ≥25                                      | 23 (21.50)  | 742 (23.80)   | 0.75 (0.46, 1.23)  |                   |       |
| 29 | <i>P</i> <sub>trend</sub> <sup>b</sup>   |             |               | 0.166              |                   |       |
| 30 | Parity                                   |             |               |                    |                   |       |
| 31 | ≤2                                       | 53 (49.07)  | 1,939 (61.77) | 1.00               | 1.00              |       |
| 32 | >2                                       | 55 (50.93)  | 1,200 (38.23) | 1.72 (1.16, 2.53)  | 1.05 (0.67, 1.64) | 0.842 |
| 33 | History of fetal loss                    |             |               |                    |                   |       |
| 34 | Never                                    | 50 (45.45)  | 1,825 (56.71) | 1.00               | 1.00              |       |
| 35 | Ever                                     | 60 (54.55)  | 1,393 (43.29) | 1.56 (1.06, 2.30)  | 1.51 (1.02, 2.23) | 0.038 |

1  
2  
3  
4  
5  
6  
7  
8  
9  
10  
11  
12  
13  
14  
15  
16  
17  
18  
19  
20  
21  
22  
23  
24  
25  
26  
27  
28  
29  
30  
31  
32  
33  
34  
35  
36  
37  
38  
39  
40  
41  
42  
43  
44  
45  
46  
47  
48  
49

|                                           |             |               |  |                   |
|-------------------------------------------|-------------|---------------|--|-------------------|
| Use of intrauterine contraceptive devices |             |               |  |                   |
| No                                        | 29 (26.85)  | 669 (21.14)   |  | 1.00              |
| Yes                                       | 79 (73.15)  | 2,495 (78.86) |  | 0.72 (0.47, 1.11) |
| Tubal ligation                            |             |               |  |                   |
| No                                        | 63 (58.33)  | 1,948 (61.57) |  | 1.00              |
| Yes                                       | 45 (41.67)  | 1,216 (38.43) |  | 1.15 (0.78, 1.69) |
| History of cervicitis                     |             |               |  |                   |
| Never                                     | 91 (86.67)  | 2,534 (85.18) |  | 1.00              |
| Ever                                      | 14 (13.33)  | 441 (14.82)   |  | 0.89 (0.50, 1.58) |
| History of vaginitis                      |             |               |  |                   |
| Never                                     | 80 (76.19)  | 2,410 (80.95) |  | 1.00              |
| Ever                                      | 25 (23.81)  | 567 (19.05)   |  | 1.32 (0.83, 2.09) |
| History of pelvic inflammation            |             |               |  |                   |
| Never                                     | 104 (96.30) | 2,794 (93.92) |  | 1.00              |
| Ever                                      | 4 (3.70)    | 181 (6.08)    |  | 0.59 (0.21, 1.63) |
| History of post-intercourse bleeding      |             |               |  |                   |
| Never                                     | 98 (91.59)  | 2,856 (90.96) |  | 1.00              |
| Ever                                      | 9 (8.41)    | 284 (9.04)    |  | 0.92 (0.46, 1.84) |
| Genital washing before sex                |             |               |  |                   |
| Rare                                      | 86 (79.63)  | 2,329 (73.52) |  | 1.00              |
| Occasional                                | 11 (10.19)  | 400 (12.63)   |  | 0.75 (0.39, 1.41) |
| Often                                     | 111 (10.19) | 439 (13.86)   |  | 0.67 (0.36, 1.28) |
| $P_{trend}^b$                             |             |               |  | 0.162             |

Abbreviations: OR, odds ratio; CI, confidence interval; GEE, Generalized Estimating Equation; NE, not estimable.  
<sup>a</sup> Variables that were statistically significant in univariate GEE regression analyses were included in multivariate models. Adjusted ORs, 95% CIs and *P* values were calculated by multivariate GEE regression model including age group, body mass index, parity, and history of fetal loss.  
<sup>b</sup> *P* values for trend were calculated by GEE regression analyses, treating categorical variables as continuous variables.

**Table 2.** Indications for and types of surgery among the 75 hysterectomy cases from rural Anyang, China, 2009-2011

| Procedure                       | Leiomyoma   | Dysfunctional uterine bleeding | Cervical cancer | Other       | Total       |
|---------------------------------|-------------|--------------------------------|-----------------|-------------|-------------|
|                                 | No. (%)     |                                |                 |             |             |
| Total abdominal hysterectomy    | 49 (92.45)  | 8 (100.00)                     | 1 (25.00)       | 5 (50.00)   | 63 (84.00)  |
| Subtotal abdominal hysterectomy | 1 (1.89)    | 0 (0.00)                       | 0 (0.00)        | 1 (10.00)   | 2 (2.67)    |
| Vaginal hysterectomy            | 0 (0.00)    | 0 (0.00)                       | 0 (0.00)        | 2 (20.00)   | 2 (2.67)    |
| Laparoscopic hysterectomy       | 1 (1.89)    | 0 (0.00)                       | 0 (0.00)        | 0 (0.00)    | 1 (1.33)    |
| Radical hysterectomy            | 0 (0.00)    | 0 (0.00)                       | 2 (50.00)       | 0 (0.00)    | 2 (2.67)    |
| Other unspecified hysterectomy  | 2 (3.77)    | 0 (0.00)                       | 1 (25.00)       | 2 (20.00)   | 5 (6.67)    |
| Total                           | 53 (100.00) | 8 (100.00)                     | 4 (100.00)      | 10 (100.00) | 75 (100.00) |

**FIGURE LEGEND**

**Figure 1.** The prevalence of prior hysterectomy (%) according to five-year age groups among 3,328 rural Chinese women, 2009-2011. The numbers of women in the 25-29, 30-34, 35-39, 40-44, 45-49, 50-54, 55-59, 60-64, and 65-69 years age groups were 313, 384, 517, 633, 374, 344, 365, 330, and 68 respectively.

**Supplementary Figure S1.** Age at time of hysterectomy among 75 cases with detailed information on hysterectomy

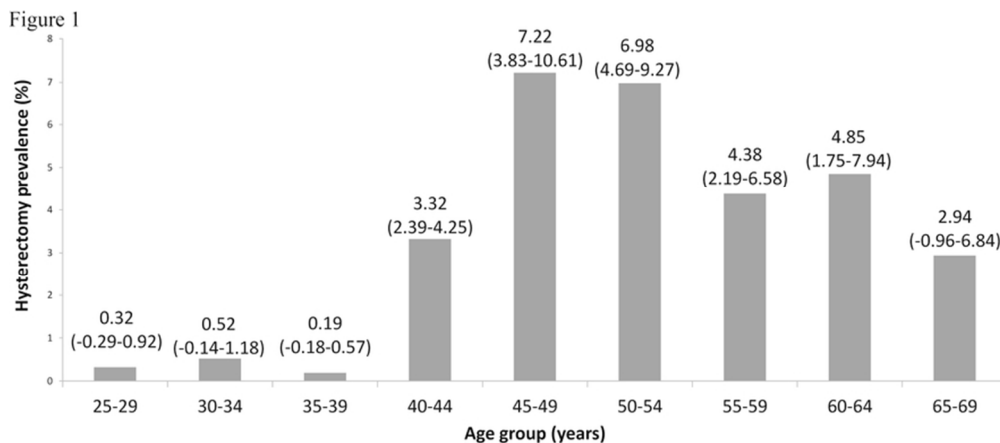

Figure 1. The prevalence of prior hysterectomy (%) according to five-year age groups among 3,328 rural Chinese women, 2009-2011. The numbers of women in the 25-29, 30-34, 35-39, 40-44, 45-49, 50-54, 55-59, 60-64, and 65-69 years age groups were 313, 384, 517, 633, 374, 344, 365, 330, and 68 respectively.

74x32mm (300 x 300 DPI)

For peer review only

1  
2  
3  
4  
5  
6  
7  
8  
9  
10  
11  
12  
13  
14  
15  
16  
17  
18  
19  
20  
21  
22  
23  
24  
25  
26  
27  
28  
29  
30  
31  
32  
33  
34  
35  
36  
37  
38  
39  
40  
41  
42  
43  
44  
45  
46  
47  
48  
49  
50  
51  
52  
53  
54  
55  
56  
57  
58  
59  
60

## Supporting Information

**Supplementary Table S1.** Selected characteristics of women included in the study of hysterectomy in rural Anyang, China, 2009-2011

| Variables                                          | No. (%)        |
|----------------------------------------------------|----------------|
| Total                                              | 3,328 (100.00) |
| Age (years)                                        |                |
| Median (Interquartile range)                       | 43 (36-54)     |
| 25-40                                              | 896 (26.92)    |
| 41-56                                              | 1,593 (47.87)  |
| 57-69                                              | 839 (25.21)    |
| Marital status                                     |                |
| Never married, divorced, separated or widowed      | 182 (5.47)     |
| Married or cohabiting                              | 3,095 (95.00)  |
| Unknown                                            | 51 (1.53)      |
| Type of employment                                 |                |
| Farming                                            | 2,946 (88.52)  |
| Non-farming                                        | 331 (9.95)     |
| Unknown                                            | 51 (1.53)      |
| Education level                                    |                |
| Illiteracy (<1 year) or primary school (1-6 years) | 1,886 (56.67)  |
| Junior high school (7-9 years)                     | 1,204 (36.18)  |
| Senior high school or above (>9 years)             | 182 (5.47)     |
| Unknown                                            | 56 (1.68)      |
| Household annual income, RMB                       |                |
| ≤10,000                                            | 534 (16.05)    |
| 10,001-29,999                                      | 551 (16.56)    |
| ≥30,000                                            | 659 (19.80)    |
| Unknown                                            | 1,584 (47.60)  |
| Cigarette smoking                                  |                |
| Never                                              | 3,268 (98.20)  |
| Ever                                               | 9 (0.27)       |
| Unknown                                            | 51 (1.53)      |
| Alcohol consumption                                |                |
| Never                                              | 3,270 (98.26)  |
| Ever                                               | 7 (0.21)       |
| Unknown                                            | 51 (1.53)      |
| Body mass index (BMI), Kg/m <sup>2</sup>           |                |
| Normal weight (18.5 ≤ BMI < 24.0)                  | 1,398 (42.01)  |
| Overweight (24.0 ≤ BMI < 28.0)                     | 1,045 (31.40)  |
| Obese (BMI ≥ 28.0)                                 | 621 (18.66)    |



|                                          |               |
|------------------------------------------|---------------|
| Underweight (BMI < 18.5)                 | 102 (3.06)    |
| Unknown                                  | 162 (4.87)    |
| Age (years) at menarche                  |               |
| ≤15                                      | 1,440 (43.27) |
| 16-18                                    | 1,436 (43.15) |
| ≥19                                      | 367 (11.03)   |
| Unknown                                  | 85 (2.55)     |
| Menstruation                             |               |
| Regular                                  | 2,296 (68.99) |
| Irregular                                | 951 (28.58)   |
| Unknown                                  | 81 (2.43)     |
| Age (years) at first birth               |               |
| ≤22                                      | 1,326 (39.84) |
| 23-24                                    | 1,133 (34.04) |
| ≥25                                      | 765 (22.99)   |
| Unknown                                  | 104 (3.13)    |
| Parity                                   |               |
| ≤ 2                                      | 1,992 (59.86) |
| > 2                                      | 1,255 (37.71) |
| Unknown                                  | 81 (2.43)     |
| History of fetal loss                    |               |
| Never                                    | 1,875 (56.34) |
| Ever                                     | 1,453 (43.66) |
| Unknown                                  |               |
| Use of intrauterine contraceptive device |               |
| No                                       | 698 (20.97)   |
| Yes                                      | 2,574 (77.34) |
| Unknown                                  | 56 (1.68)     |
| Tubal ligation                           |               |
| No                                       | 2,011 (60.43) |
| Yes                                      | 1,261 (37.89) |
| Unknown                                  | 56 (1.68)     |
| History of cervicitis                    |               |
| Never                                    | 2,625 (78.88) |
| Ever                                     | 455 (13.67)   |
| Unknown                                  | 248 (7.45)    |
| History of vaginitis                     |               |
| Never                                    | 2,490 (74.82) |
| Ever                                     | 592 (17.79)   |
| Unknown                                  | 246 (7.39)    |
| History of pelvic inflammation           |               |
| Never                                    | 2,898 (87.08) |
| Ever                                     | 185 (5.56)    |
| Unknown                                  | 245 (7.36)    |

|    |                                      |               |
|----|--------------------------------------|---------------|
| 1  |                                      |               |
| 2  |                                      |               |
| 3  |                                      |               |
| 4  | History of post-intercourse bleeding |               |
| 5  | Never                                | 2,954 (88.76) |
| 6  | Ever                                 | 293 (8.80)    |
| 7  | Unknown                              | 81 (2.43)     |
| 8  |                                      |               |
| 9  | Genital washing before sex           |               |
| 10 | Rare                                 | 2,415 (72.57) |
| 11 | Occasional                           | 411 (12.35)   |
| 12 | Often                                | 450 (13.52)   |
| 13 | Unknown                              | 52 (1.56)     |
| 14 |                                      |               |
| 15 |                                      |               |
| 16 |                                      |               |
| 17 |                                      |               |
| 18 |                                      |               |
| 19 |                                      |               |
| 20 |                                      |               |
| 21 |                                      |               |
| 22 |                                      |               |
| 23 |                                      |               |
| 24 |                                      |               |
| 25 |                                      |               |
| 26 |                                      |               |
| 27 |                                      |               |
| 28 |                                      |               |
| 29 |                                      |               |
| 30 |                                      |               |
| 31 |                                      |               |
| 32 |                                      |               |
| 33 |                                      |               |
| 34 |                                      |               |
| 35 |                                      |               |
| 36 |                                      |               |
| 37 |                                      |               |
| 38 |                                      |               |
| 39 |                                      |               |
| 40 |                                      |               |
| 41 |                                      |               |
| 42 |                                      |               |
| 43 |                                      |               |
| 44 |                                      |               |
| 45 |                                      |               |
| 46 |                                      |               |
| 47 |                                      |               |
| 48 |                                      |               |
| 49 |                                      |               |
| 50 |                                      |               |
| 51 |                                      |               |
| 52 |                                      |               |
| 53 |                                      |               |
| 54 |                                      |               |
| 55 |                                      |               |
| 56 |                                      |               |
| 57 |                                      |               |
| 58 |                                      |               |
| 59 |                                      |               |
| 60 |                                      |               |

---

For peer review only

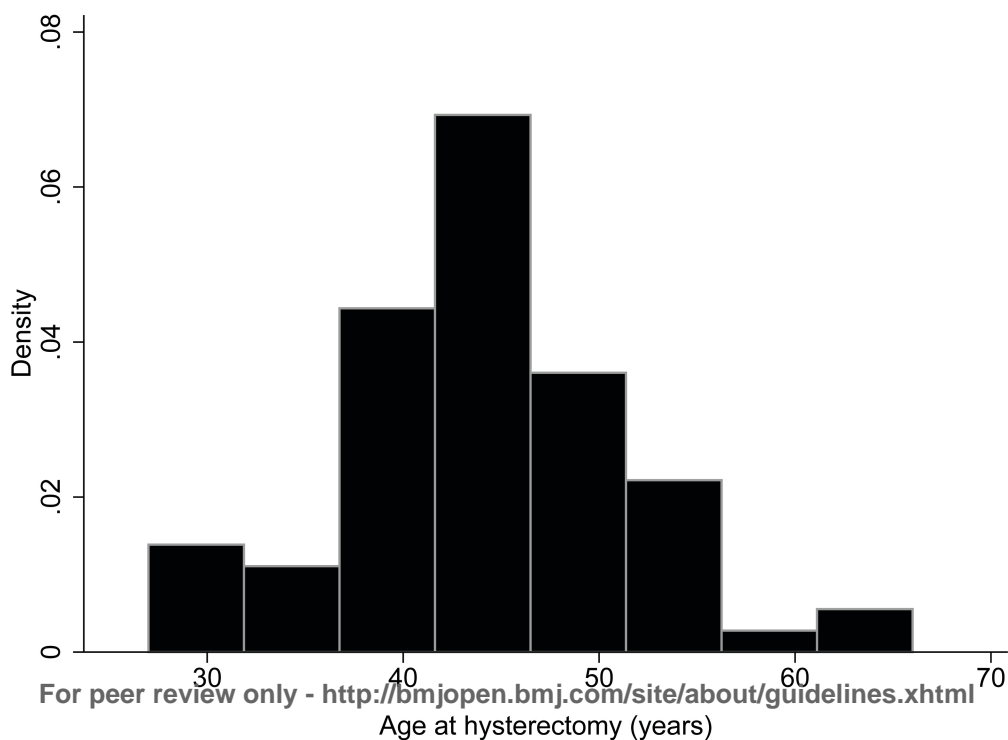

For peer review only - <http://bmjopen.bmj.com/site/about/guidelines.xhtml>

1  
2  
3  
4  
5  
6  
7  
8  
9  
10  
11  
12  
13  
14  
15  
16  
17  
18  
19  
20  
21  
22  
23  
24  
25  
26

STROBE Statement—Checklist of items that should be included in reports of *cross-sectional studies*

|                              | Item No | Recommendation                                                                                                                                                                                               | Reported on page # |
|------------------------------|---------|--------------------------------------------------------------------------------------------------------------------------------------------------------------------------------------------------------------|--------------------|
| <b>Title and abstract</b>    | 1       | (a) Indicate the study's design with a commonly used term in the title or the abstract                                                                                                                       | 1                  |
|                              |         | (b) Provide in the abstract an informative and balanced summary of what was done and what was found                                                                                                          | 3,4                |
| <b>Introduction</b>          |         |                                                                                                                                                                                                              |                    |
| Background/rationale         | 2       | Explain the scientific background and rationale for the investigation being reported                                                                                                                         | 5                  |
| Objectives                   | 3       | State specific objectives, including any prespecified hypotheses                                                                                                                                             | 5                  |
| <b>Methods</b>               |         |                                                                                                                                                                                                              |                    |
| Study design                 | 4       | Present key elements of study design early in the paper                                                                                                                                                      | 5,6                |
| Setting                      | 5       | Describe the setting, locations, and relevant dates, including periods of recruitment, exposure, follow-up, and data collection                                                                              | 5,6                |
| Participants                 | 6       | (a) Give the eligibility criteria, and the sources and methods of selection of participants                                                                                                                  | 6                  |
| Variables                    | 7       | Clearly define all outcomes, exposures, predictors, potential confounders, and effect modifiers. Give diagnostic criteria, if applicable                                                                     | 6                  |
| Data sources/<br>measurement | 8*      | For each variable of interest, give sources of data and details of methods of assessment (measurement). Describe comparability of assessment methods if there is more than one group                         | 6                  |
| Bias                         | 9       | Describe any efforts to address potential sources of bias                                                                                                                                                    | 6                  |
| Study size                   | 10      | Explain how the study size was arrived at                                                                                                                                                                    | 5,6                |
| Quantitative<br>variables    | 11      | Explain how quantitative variables were handled in the analyses. If applicable, describe which groupings were chosen and why                                                                                 | 6,7                |
| Statistical methods          | 12      | (a) Describe all statistical methods, including those used to control for confounding                                                                                                                        | 7                  |
|                              |         | (b) Describe any methods used to examine subgroups and interactions                                                                                                                                          | 7                  |
|                              |         | (c) Explain how missing data were addressed                                                                                                                                                                  |                    |
|                              |         | (d) If applicable, describe analytical methods taking account of sampling strategy                                                                                                                           |                    |
|                              |         | (e) Describe any sensitivity analyses                                                                                                                                                                        |                    |
| <b>Results</b>               |         |                                                                                                                                                                                                              |                    |
| Participants                 | 13*     | (a) Report numbers of individuals at each stage of study—eg numbers potentially eligible, examined for eligibility, confirmed eligible, included in the study, completing follow-up, and analysed            | 8,9                |
|                              |         | (b) Give reasons for non-participation at each stage                                                                                                                                                         | 8,9                |
|                              |         | (c) Consider use of a flow diagram                                                                                                                                                                           |                    |
| Descriptive data             | 14*     | (a) Give characteristics of study participants (eg demographic, clinical, social) and information on exposures and potential confounders                                                                     | 8,9                |
|                              |         | (b) Indicate number of participants with missing data for each variable of interest                                                                                                                          | 8,9                |
| Outcome data                 | 15*     | Report numbers of outcome events or summary measures                                                                                                                                                         | 8,9                |
| Main results                 | 16      | (a) Give unadjusted estimates and, if applicable, confounder-adjusted estimates and their precision (eg, 95% confidence interval). Make clear which confounders were adjusted for and why they were included | 8,9                |

|                          |    |                                                                                                                                                                            |          |
|--------------------------|----|----------------------------------------------------------------------------------------------------------------------------------------------------------------------------|----------|
|                          |    | (b) Report category boundaries when continuous variables were categorized                                                                                                  | 21,22,23 |
|                          |    | (c) If relevant, consider translating estimates of relative risk into absolute risk for a meaningful time period                                                           |          |
| Other analyses           | 17 | Report other analyses done—eg analyses of subgroups and interactions, and sensitivity analyses                                                                             |          |
| <b>Discussion</b>        |    |                                                                                                                                                                            |          |
| Key results              | 18 | Summarise key results with reference to study objectives                                                                                                                   | 9,10     |
| Limitations              | 19 | Discuss limitations of the study, taking into account sources of potential bias or imprecision. Discuss both direction and magnitude of any potential bias                 | 13,14    |
| Interpretation           | 20 | Give a cautious overall interpretation of results considering objectives, limitations, multiplicity of analyses, results from similar studies, and other relevant evidence | 11,12,13 |
| Generalisability         | 21 | Discuss the generalisability (external validity) of the study results                                                                                                      | 13,14    |
| <b>Other information</b> |    |                                                                                                                                                                            |          |
| Funding                  | 22 | Give the source of funding and the role of the funders for the present study and, if applicable, for the original study on which the present article is based              | 15       |

\*Give information separately for exposed and unexposed groups.

**Note:** An Explanation and Elaboration article discusses each checklist item and gives methodological background and published examples of transparent reporting. The STROBE checklist is best used in conjunction with this article (freely available on the Web sites of PLoS Medicine at <http://www.plosmedicine.org/>, Annals of Internal Medicine at <http://www.annals.org/>, and Epidemiology at <http://www.epidem.com/>). Information on the STROBE Initiative is available at [www.strobe-statement.org](http://www.strobe-statement.org).
