# Supplementary material for: The epidemiological profile of hysterectomy in rural Chinese women: a population-based study
Source: PubMed Central journal article supplement — BMJ Open. 2017 Jun 30;7(6):e015351. doi: 10.1136/bmjopen-2016-015351 (PMC5734410; doi:10.1136/bmjopen-2016-015351), 2017-06-30
Supplement: bmjopen-2016-015351supp001.pdf [file bmjopen-2016-015351supp001.pdf]

## Supporting Information

**Supplementary Table S1.** Selected characteristics of women included in the study of hysterectomy in rural Anyang, China, 2009-2011

| Variables                                          | No. (%)        |
|----------------------------------------------------|----------------|
| Total                                              | 3,328 (100.00) |
| Age (years)                                        |                |
| Median (Interquartile range)                       | 43 (36-54)     |
| 25-40                                              | 896 (26.92)    |
| 41-56                                              | 1,593 (47.87)  |
| 57-69                                              | 839 (25.21)    |
| Marital status                                     |                |
| Never married, divorced, separated or widowed      | 182 (5.47)     |
| Married or cohabiting                              | 3,095 (95.00)  |
| Unknown                                            | 51 (1.53)      |
| Type of employment                                 |                |
| Farming                                            | 2,946 (88.52)  |
| Non-farming                                        | 331 (9.95)     |
| Unknown                                            | 51 (1.53)      |
| Education level                                    |                |
| Illiteracy (<1 year) or primary school (1-6 years) | 1,886 (56.67)  |
| Junior high school (7-9 years)                     | 1,204 (36.18)  |
| Senior high school or above (>9 years)             | 182 (5.47)     |
| Unknown                                            | 56 (1.68)      |
| Household annual income, RMB                       |                |
| ≤10,000                                            | 534 (16.05)    |
| 10,001-29,999                                      | 551 (16.56)    |
| ≥30,000                                            | 659 (19.80)    |
| Unknown                                            | 1,584 (47.60)  |
| Cigarette smoking                                  |                |
| Never                                              | 3,268 (98.20)  |
| Ever                                               | 9 (0.27)       |
| Unknown                                            | 51 (1.53)      |
| Alcohol consumption                                |                |
| Never                                              | 3,270 (98.26)  |
| Ever                                               | 7 (0.21)       |
| Unknown                                            | 51 (1.53)      |
| Body mass index (BMI), Kg/m <sup>2</sup>           |                |
| Normal weight (18.5 ≤ BMI < 24.0)                  | 1,398 (42.01)  |
| Overweight (24.0 ≤ BMI < 28.0)                     | 1,045 (31.40)  |
| Obese (BMI ≥ 28.0)                                 | 621 (18.66)    |

|                                          |               |
|------------------------------------------|---------------|
| Underweight (BMI < 18.5)                 | 102 (3.06)    |
| Unknown                                  | 162 (4.87)    |
| Age (years) at menarche                  |               |
| ≤15                                      | 1,440 (43.27) |
| 16-18                                    | 1,436 (43.15) |
| ≥19                                      | 367 (11.03)   |
| Unknown                                  | 85 (2.55)     |
| Menstruation                             |               |
| Regular                                  | 2,296 (68.99) |
| Irregular                                | 951 (28.58)   |
| Unknown                                  | 81 (2.43)     |
| Age (years) at first birth               |               |
| ≤22                                      | 1,326 (39.84) |
| 23-24                                    | 1,133 (34.04) |
| ≥25                                      | 765 (22.99)   |
| Unknown                                  | 104 (3.13)    |
| Parity                                   |               |
| ≤ 2                                      | 1,992 (59.86) |
| > 2                                      | 1,255 (37.71) |
| Unknown                                  | 81 (2.43)     |
| History of fetal loss                    |               |
| Never                                    | 1,875 (56.34) |
| Ever                                     | 1,453 (43.66) |
| Unknown                                  |               |
| Use of intrauterine contraceptive device |               |
| No                                       | 698 (20.97)   |
| Yes                                      | 2,574 (77.34) |
| Unknown                                  | 56 (1.68)     |
| Tubal ligation                           |               |
| No                                       | 2,011 (60.43) |
| Yes                                      | 1,261 (37.89) |
| Unknown                                  | 56 (1.68)     |
| History of cervicitis                    |               |
| Never                                    | 2,625 (78.88) |
| Ever                                     | 455 (13.67)   |
| Unknown                                  | 248 (7.45)    |
| History of vaginitis                     |               |
| Never                                    | 2,490 (74.82) |
| Ever                                     | 592 (17.79)   |
| Unknown                                  | 246 (7.39)    |
| History of pelvic inflammation           |               |
| Never                                    | 2,898 (87.08) |
| Ever                                     | 185 (5.56)    |
| Unknown                                  | 245 (7.36)    |

|                                      |               |
|--------------------------------------|---------------|
| History of post-intercourse bleeding |               |
| Never                                | 2,954 (88.76) |
| Ever                                 | 293 (8.80)    |
| Unknown                              | 81 (2.43)     |
| Genital washing before sex           |               |
| Rare                                 | 2,415 (72.57) |
| Occasional                           | 411 (12.35)   |
| Often                                | 450 (13.52)   |
| Unknown                              | 52 (1.56)     |

---
