# Supplementary figures and images for: The epidemiological profile of hysterectomy in rural Chinese women: a population-based study
Source: PubMed Central journal article supplement — BMJ Open. 2017 Jun 30;7(6):e015351. doi: 10.1136/bmjopen-2016-015351 (PMC5734410; doi:10.1136/bmjopen-2016-015351), 2017-06-30

Supplementary Figure S1

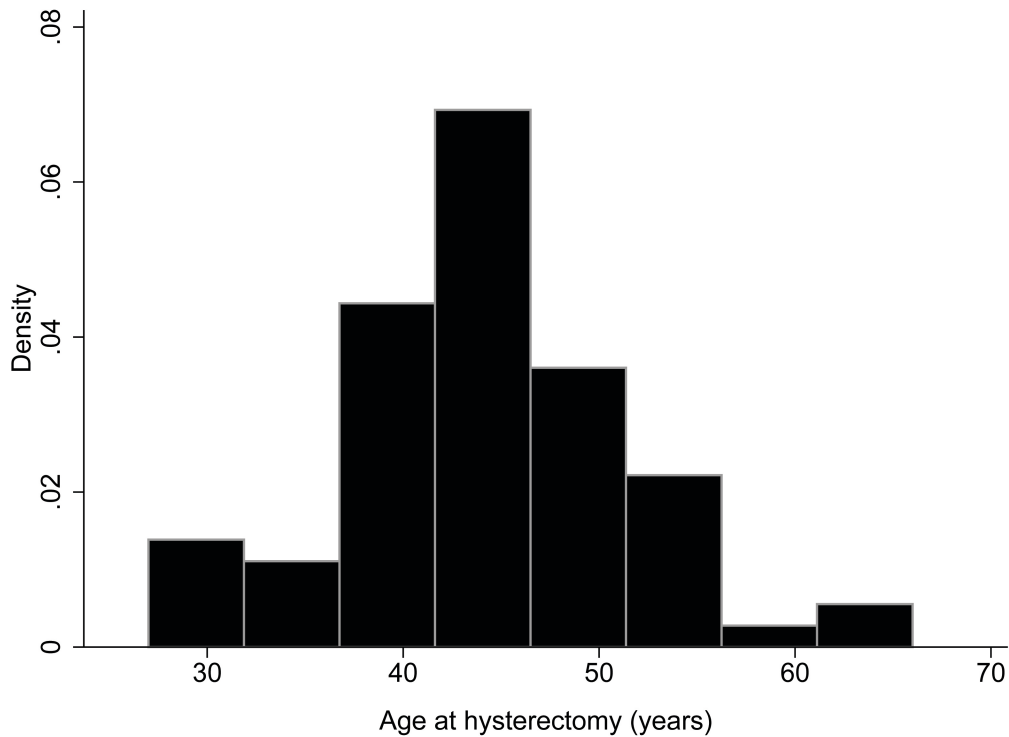

Supplement: bmjopen-2016-015351supp002.pdf [file bmjopen-2016-015351supp002.pdf]
